# Supplementary material for: DNAzyme-based biosensor as a rapid and accurate verification tool to complement simultaneous enzyme-based media forE. colidetection
Source: Royal Society of Chemistry journal article supplement (doi:10.1039/c9ew00795d), 2019-01-01
Supplement: c9ew00795d1.pdf [file c9ew00795d1.pdf]

### **Supplemental Information**

#### **DNAzyme-based biosensor as a rapid and accurate verification tool to complement simultaneous enzyme-based media for *E. coli* detection**

Noor Zaouri<sup>1</sup>, Zhengfang Cui<sup>2</sup>, Ana Sol Peinetti<sup>2</sup>, Yi Lu<sup>2</sup>, Pei-Ying Hong<sup>1\*</sup>

1. King Abdullah University of Science and Technology (KAUST), Water Desalination and Reuse Center, Division of Biological and Environmental Science and Engineering, Thuwal 239455-6900, Saudi Arabia
2. Department of Chemistry, University of Illinois at Urbana-Champaign, Urbana, IL 61801, United States

\* Corresponding author

Pei-Ying Hong

Email: [peiyong.hong@kaust.edu.sa](mailto:peiyong.hong@kaust.edu.sa)

Tel: +966 12 808 2218

## **Protein identification using LC-MS/MS**

### **1.1. Protein digestion**

The eluted protein solution from the silica based membrane solution was run in SDS-dPAGE to remove impurities that could inhibit protein digestion. Gel bands were excised and cut into small pieces of 1 by 1 mm, and transferred to a sterile 2 mL tube. Gel pieces were de-stained for 5 min with shaking in 100  $\mu$ L 50% acetonitrile (ACN) in 100 mM ammonium bicarbonate ( $\text{NH}_4\text{HCO}_3$ ) for at least 3 times. The gel pieces were dried with 100  $\mu$ L of ACN for 10 min. Dehydrated samples were reduced by incubation for 20 min at 45°C in 50  $\mu$ L 10 mM TCEP (tris 2-carboxyethyl phosphine) in 100 mM  $\text{NH}_4\text{HCO}_3$ . After removal of reducing solution, dehydration with ACN was performed, and then 50  $\mu$ L of alkylating solution (20 mM dimethylacrylamide in 100 mM  $\text{NH}_4\text{HCO}_3$ ) was added and incubated for 20 min. Gel pieces were washed twice with the de-staining solution and dried with 100  $\mu$ L ACN. The samples were digested overnight at 37°C with 50  $\mu$ L 0.01  $\mu$ g/ $\mu$ L of trypsin solution in 50 mM  $\text{NH}_4\text{HCO}_3$  and 5% ACN and pH 8.5. Elution of peptides from the gel pieces was performed by adding 2  $\mu$ L of formic acid and then 100  $\mu$ L of ACN. The mixture was then incubated for 10 min with shaking. The supernatant was collected in a new clean tube, and the gel pieces were re-hydrated with 50  $\mu$ L of 5% formic acid in water, and then 100  $\mu$ L of ACN was added and the supernatant was collected (two times). All supernatants were combined and dried with a SpeedVac prior purification.

## **1.2. Protein purification**

First, the dried peptides were dissolved with 100  $\mu$ L of 0.1% trifluoroacetic acid (TFA) in water. Then, OMIX C18 tips) were conditioned twice with 50:50 % (v/v) water and ACN and then twice with 0.1% TFA. The peptides were pipetted in and out of the tip for 10 times. Peptides bound to the tip were cleaned by pipetting with 0.1% TFA twice. The peptides were eluted with 75% ACN then with 0.1% TFA. The eluted solution were collected and dried with SpedVac. The sample was dissolved with 2 % ACN and 0.1% TFA for mass spectrometry (MS /MS) analysis.

## **1.3. LC-MS/MS operating condition**

NanoLC MS/MS analysis was performed using an on-line system consisting of a nano-pump UltiMate 3000 UHPLC binary HPLC system (Dionex, ThermoFisher) coupled to a Q-Exactive HF mass spectrometer (ThermoFisher, Biberach, Germany). Peptides were re-suspended in 3% ACN, 0.1% formic acid and injected into a pre-column 300  $\mu$ m $\times$ 5 mm (Acclaim PepMap, 5  $\mu$ m particle size). After loading, peptides were injected to an Acclaim PepMap100 C18 capillary column (75  $\mu$ m  $\times$  15 cm, 100  $\text{\AA}$ , 3  $\mu$ m particle sizes).

Peptides were eluted into the MS at a flow rate of 300 nL/min, using a 40 min gradient from 7% to 38% mobile phase B (80% acetonitrile and 0.1% formic acid). Mobile phase A was 0.1% formic acid in H<sub>2</sub>O.

The mass spectrometer was operated in data-dependent mode, with a single MS scan (350-1400 m/z at 60 000 resolution (at 200 m/z) in a profile mode) followed by MS/MS scans on the 10 most intense ions at 15 000 resolution. Ions selected for MS/MS scan were fragmented using higher energy collision dissociation (HCD) at normalized collision energy of 28% with an isolation window of 1.8 m/z.

#### **1.4. Data Analysis**

Raw files were converted to MGF files using Protein Discoverer version 2.2 and searched against the *E. coli* UniProt database using MASCOT Version 2.6 (Matrix Science Ltd, London, UK). Search parameters were peptide mass tolerance of 5 ppm (parts per million), and MS/MS tolerance of 0.02 amu allowing 2 missed cleavage. Dimethyl-Propionamide (C) was set as fixed modification, and acetyl (Protein N-term), and Oxidation (M), were allowed as variable modification. Peptide assignments with ion score cut-off of 20 and a significance threshold of  $p < 0.05$  were exported to Excel for further analysis.

To narrow down the protein list that hybridized to the liquid sensor, only ubiquitous proteins that were consistently present in all tested CIM were considered. In addition, protein targets must be bigger than 30 kDa.

**Table S1.** List of the investigated fecal coliforms and total coliforms bacteria (target and non-target) reported by Zhang, et al. <sup>1</sup>, and tested against DNAzyme biosensor in this study.

| Bacteria name            | ID           | Bacteria name             | ID            | Bacteria name            | ID             | Bacteria name           | ID            |
|--------------------------|--------------|---------------------------|---------------|--------------------------|----------------|-------------------------|---------------|
| <i>E. coli</i>           | OH 1         | <i>Enterobacter</i> VIII  | FL-10-SCAN -4 | <i>Serratia</i> group II | 2-EPA 2        | <i>Aeromonas</i>        | 021110-12     |
|                          | OH 3         | <i>Wautersia</i>          | 3530          |                          | EPA 75         | <i>Acinetobacter</i>    | PA-15-CULT-3  |
|                          | OH 11        | <i>Enterobacter</i> IX    | EPA 72        |                          | EPA 76         |                         | PA-15-CULT-9  |
|                          | OH 18        |                           | 012610-08     |                          | EPA 214        |                         | PA-15-CULT-10 |
| <i>Klebsiella</i> I      | OH 2         |                           | 612610-12     | <i>Providencia</i>       | OH 10          | <i>Chryseobacterium</i> | PA-16-CULT-5  |
|                          | OH 8         |                           | 012610-06     |                          | CCP-1-3        |                         | VA-5-CULT-4   |
|                          | OH 15        |                           | 02044-07      |                          | 6-1            |                         | VA-6-CULT-4   |
|                          | EPA 77       |                           | 02664-06      |                          | 10-2           |                         | FL-7-CULT-4   |
|                          | EPA 185      | <i>Citroabacter</i> II    | OH 6          |                          | 006            | <i>Micobacterium</i>    | NJ-20-CULT-6  |
|                          | EPA 193      |                           | EPA 81        |                          | 008            |                         | FL-9-CULT-2   |
|                          |              |                           | EPA 153       | <i>Morganell</i>         | CA-33-Colite-3 |                         | FL-9-CULT-3   |
| <i>Enterobacter</i> V    | EPA 61       | <i>Raoultella</i> group I | EPA 159       |                          | MA-35-Ready 2  |                         | FL-9 CUTL-4   |
|                          | EPA 176      |                           | EPA 191       |                          | VA-53-Ready-2  |                         | FL-9-CULT-5   |
|                          | EPA 179      |                           | EPA 192       |                          | VA-54-colite-2 |                         |               |
|                          | EPA 180      |                           | 15            |                          | EPA 227        |                         |               |
|                          | EPA 181      |                           | 121           |                          | 007            |                         |               |
|                          |              |                           | EPA 10        | <i>Plesiomonas</i>       | EPA 45         |                         |               |
| <i>Enterobacter</i> VI   | EPA 64       | <i>Serratia</i> group I   | EPA 117       |                          | EPA 49         |                         |               |
|                          | EPA 69       |                           | EPA 194       |                          | EPA 50         |                         |               |
|                          | EPA82        |                           | EPA 74        |                          | EPA 52         |                         |               |
|                          | EPA86        |                           | EPA 231       |                          | EPA 55         |                         |               |
|                          | EPA186       |                           | EPA 244       |                          | EPA 56         |                         |               |
|                          | EPA187       |                           | EPA 246       | <i>Aeromonas</i>         | EPA 124        |                         |               |
| <i>Enterobacter</i> VIII | FL-10-BLUE-3 | <i>Serratia</i> group II  | EPA 248       |                          | EPA 131        |                         |               |
|                          | FL-10-BLUE-4 |                           | 20410-17      |                          | EPA 150        |                         |               |
|                          | FL-10-BLUE 5 |                           | CO-1-CULT-1   |                          | 011110-09      |                         |               |
|                          | FL-10-CULT-2 |                           | MA-21-READY   |                          | 021110-11      |                         |               |
|                          | FL-10-SCAN-2 |                           |               |                          |                |                         |               |

**Table S2.** List of proteins in *E. coli* OH11 CIM that interacted with *E. coli* DNAzyme.

| Protein       | Description                              | Protein score | MW (KDa) | Protein match | Protein sequence                                                                                                                                                                                              |
|---------------|------------------------------------------|---------------|----------|---------------|---------------------------------------------------------------------------------------------------------------------------------------------------------------------------------------------------------------|
| <b>P04949</b> | Flagellin                                | 3949          | 51.3     | 93            | DDAAGQAIANR<br>LSSGLRINSKDDAAGQAIANR<br>INSAKDDAAGQAIANR<br>AQVINTNSLSLITQNNINK                                                                                                                               |
| <b>P0A8T7</b> | DNA-directed RNA polymerase subunit beta | 685           | 155.1    | 27            | DLLGITK<br>LIDEFGR<br>VADLFEAR<br>GLKENVIVGR<br>SVITVGPYLR<br>LLDLAAPDIIVR<br>FATSDLNDLYRR<br>QLNVFEGERVER<br>LIPAGTGYAYHQDR<br>IGLLDMPLRDIER<br>EGLNVLQYFISTHGAR<br>YNKVIDIWAAANDRVSK<br>GLMAKPDGSIETPITANFR |
| <b>P46889</b> | DNA translocase                          | 40            | 146.6    | 3             | SLSTVAVR                                                                                                                                                                                                      |
| <b>P06612</b> | DNA topoisomerase                        | 20            | 97.3     | 1             | ALVIVESPAK                                                                                                                                                                                                    |
| <b>P0AES4</b> | DNA gyrase subunit A                     | 51            | 96.9     | 1             | NTQGVILIR                                                                                                                                                                                                     |
| <b>P36659</b> | Curved DNA-binding protein               | 26            | 34.4     | 1             | QTGDLYAVLK                                                                                                                                                                                                    |
| <b>P46850</b> | RNA-splicing ligase                      | 17            | 45.2     | 7             | KLFSVEDQIR                                                                                                                                                                                                    |
| <b>P75937</b> | Flagellar hook protein                   | 923           | 42.0     | 21            | ELVNMIVAQR                                                                                                                                                                                                    |

|               |                                           |      |      |    |                                                                                                                                                                                                                                                                                                                                                              |
|---------------|-------------------------------------------|------|------|----|--------------------------------------------------------------------------------------------------------------------------------------------------------------------------------------------------------------------------------------------------------------------------------------------------------------------------------------------------------------|
| <b>P0A6Y8</b> | Chaperone protein                         | 1396 | 69.1 | 42 | DVSIMPFK<br>VAEFFGKEPR<br>MAPPQISAEVLK<br>KVAEFFGKEPR<br>MAPPQISAEVLKK<br>AKLESLVEDLVNR<br>SLGQFNLDGINPAPR<br>QAVTNPQNTLFAIKR<br>IIAADNGDAWVEVKGQK<br>AADNKSLGQFNLDGINPAPR<br>IINEPTAAALAYGLDKGTGNR<br>HSQVFSTAEDNQSAVTIHVLQGER<br>AKIELSSAQQTVDNLPYITADATGPK<br>TAEDYLGEPVTEAVITVPAYFNDAQR<br>KTAEDYLGEPVTEAVITVPAYFNDAQR<br>VLENAEGDRTPSHIAYTQDGETLVGQPAKR |
| <b>P0A7Z4</b> | DNA-directed RNA polymerase subunit alpha | 851  | 36.5 | 27 | GLSLGMR<br>TEVELLK<br>VTLEPLER<br>IAYNVEAAR<br>GFGHTLGNALR<br>SLTEIKDVLASR<br>MQGSVTEFLKPR<br>LVDIEQVSSTHAK<br>VQKDEVILTINK<br>KSLTEIKDVLASR<br>LLVDACYSPVER<br>AEAIHYIGDLVQR<br>IAYNVEAARVEQR<br>LVDSNGSVFYSR<br>SGTASFADMFAFSK<br>GLDVAISQNGFFR<br>TQDQILNTLVNLR<br>VAGITQDFTDGTNTTGR<br>GSVTVFDSQGNADMSVYFVK<br>AFSQAVSGLNAAATNLDVIGNNIANSATYGFK          |

|               |                                   |     |      |    |                                                                                                                                                                                                                         |
|---------------|-----------------------------------|-----|------|----|-------------------------------------------------------------------------------------------------------------------------------------------------------------------------------------------------------------------------|
| <b>P33235</b> | Flagellar hook-associated protein | 580 | 57.9 | 16 | SEGLVNQFK<br>QIASLNDQISR<br>QLAAVPSSADPSR<br>EYDAFITNQLR<br>LLNTGSLGGILTFR<br>ISFDNNQWQVTR<br>LASNTTFTVTPDANGK<br>SFNDAYASLVSDIGNK<br>TTVAYVDGTAGNIEIPEK<br>AGFDANGDAGEDFFAIGKPAVLQNTK<br>TTDQYLRDQDKQVNIAIGASVDQINNYAK |
|---------------|-----------------------------------|-----|------|----|-------------------------------------------------------------------------------------------------------------------------------------------------------------------------------------------------------------------------|



**Table S3.** List of proteins in *E. coli* OH18 CIM that interacted with *E. coli* DNAzyme.

| Protein ID    | Description                              | Protein score | MW (KDa) | protein match | Protein sequence                                                                                                                                                                                  |
|---------------|------------------------------------------|---------------|----------|---------------|---------------------------------------------------------------------------------------------------------------------------------------------------------------------------------------------------|
| <b>P04949</b> | Flagellin                                | 2491          | 51.3     | 32            | LSSGLRINSAK<br>FTSNIKGLTQAAR<br>AQIIQQAGNSVLAK<br>INSAKDDAAGQAIANR<br>IQDADYATEVSNMSK<br>AQVINTNSLSLITQNNINK<br>LSSGLRINSAKDDAAGQAIANR<br>INSAKDDAAGQAIANRFTSNIK<br>IQDADYATEVSNMSKAQIIQQAGNSVLAK |
| <b>P0A8T7</b> | DNA-directed RNA polymerase subunit beta | 447           | 155.1    | 15            | DLLGITK<br>VADLFEAR<br>GLKENVIVGR<br>SVITVGPYLR<br>LLDLAAPDIIVR<br>FTDMIDGQTITR<br>LGIQAFEPVLIIEGK<br>LIPAGTGYAYHQDR<br>EGLNVLQYFISTHGAR                                                          |
| <b>P46889</b> | DNA translocase                          | 47            | 146.6    | 3             | SLSTVAVR                                                                                                                                                                                          |
| <b>P06612</b> | DNA topoisomerase                        | 103           | 97.3     | 3             | LYQLIWR<br>ALVIVESPAK<br>GIGRPSTYASIISTIQDR                                                                                                                                                       |
| <b>P0AES4</b> | DNA gyrase subunit A                     | 209           | 96.9     | 5             | NTQGVILIR<br>TAEDENVVGLQR<br>GRPIVNLLPLEQDER<br>AGDDAARPEWLEPEFGVR                                                                                                                                |

|               |                                              |      |      |    |                                                                                                                                                                                                                                                                                                                                                    |
|---------------|----------------------------------------------|------|------|----|----------------------------------------------------------------------------------------------------------------------------------------------------------------------------------------------------------------------------------------------------------------------------------------------------------------------------------------------------|
| <b>P0A6Y8</b> | Chaperone protein                            | 1168 | 69.1 | 34 | IAGLEVK<br>VAEFFGKEPR<br>DAGRIAGLEVKR<br>ASSGLNEDEIQK<br>KVAEFFGKEPR<br>MAPPQISAEVLKK<br>AKLESLVEDLVNR<br>SLGQFNLDGINPAPR<br>QAVTNPQNTLFAIKR<br>AADNKSLGQFNLDGINPAPR<br>IINEPTAAALAYGLDKGTGNR<br>RIINEPTAAALAYGLDKGTGNR<br>HSQVFSTAEDNQSAVTIHVLQGER<br>TAEDYLGEVPTEAVITVPAYFNDAQR<br>KTAEDYLGEVPTEAVITVPAYFNDAQR<br>VLENAEGDRTPSIHAYTQDGETLVGQPAKR |
| <b>P0A7Z4</b> | DNA-directed RNA polymerase subunit<br>alpha | 615  | 36.5 | 20 | IAYNVEAAR<br>SLTEIKDVLASR<br>MQGSVTEFLKPR<br>LVDIEQVSSTHAK<br>IHSEEDERPIGR<br>KSLTEIKDVLASR<br>LLVDACYSPVER<br>IAYNVEAARVEQR                                                                                                                                                                                                                       |
| <b>P36659</b> | Curved DNA-binding protein                   | 129  | 34.4 | 4  | QTGDLYAVLK<br>KYHPDVSKEPDAREAR<br>FKEVAEAEVLSDEQR                                                                                                                                                                                                                                                                                                  |
| <b>P46850</b> | RNA-splicing ligase                          | 17   | 45.2 | 7  | KLFSVEDQIR<br>ELVNMIVAQR<br>TQDQILNTLVNLR                                                                                                                                                                                                                                                                                                          |
| <b>P75937</b> | Flagellar hook protein                       | 710  | 42.0 | 12 | VAGITQDFTDGTNTNTGR<br>NYQSNAQTIKTQDQILNTLVNLR<br>AFSQAVSGLNAAATNLDVIGNNIANSATYGFK                                                                                                                                                                                                                                                                  |

|               |                                   |     |      |    |                                                                                                                                            |
|---------------|-----------------------------------|-----|------|----|--------------------------------------------------------------------------------------------------------------------------------------------|
| <b>P33235</b> | Flagellar hook-associated protein | 393 | 57.9 | 11 | SEGLVNQFK<br>QIASLNDQISR<br>EYDAFITNQLR<br>LLNTGSLGGILTFR<br>ISFDNNQWQVTR<br>LTGVGAGASPNNLLDQR<br>SSLINNAMSGLNAAQAALNTASNNISSYINVAGYT<br>R |
|---------------|-----------------------------------|-----|------|----|--------------------------------------------------------------------------------------------------------------------------------------------|
