# Supplementary material for: DNAzyme-based biosensor as a rapid and accurate verification tool to complement simultaneous enzyme-based media forE. colidetection
Source: Royal Society of Chemistry journal article supplement (doi:10.1039/c9ew00795d), 2019-01-01
Supplement: c9ew00795d2.xlsx [file c9ew00795d2.xlsx]

## Sheet: P04949
Table S4. Best matched identites of the individual proteins bound to the biosensor. Green highlight denotes match against E. coli. Yellow highlight denotes match against non-E. coli strains included for testing in this study
Select for downloading or viewing reports	Description	Max Score	Total Score	Query Cover	E value	Per. Ident	Accession
Select seq ref|WP_032266072.1|	flagellin FliC [Escherichia coli]	51.6	91.6	0.66	6e-06	0.9615	WP_032266072.1
Select seq ref|WP_069684415.1|	hypothetical protein [Escherichia coli]	48.5	87	0.66	8e-06	0.9231	WP_069684415.1
Select seq ref|WP_108727156.1|	FliC/FljB family flagellin [Alcaligenes aquatilis]	51.6	51.6	0.47	6e-06	0.875	WP_108727156.1
Select seq ref|WP_006820492.1|	hypothetical protein [Yokenella regensburgei]	51.6	51.6	0.47	6e-06	0.875	WP_006820492.1
Select seq ref|WP_120816098.1|	flagellin FliC [Yokenella regensburgei]	51.6	51.6	0.47	6e-06	0.875	WP_120816098.1
Select seq ref|WP_123051531.1|	FliC/FljB family flagellin [Alcaligenes faecalis]	51.6	51.6	0.47	7e-06	0.875	WP_123051531.1
Select seq ref|WP_045931723.1|	FliC/FljB family flagellin [Alcaligenes faecalis]	51.6	51.6	0.47	7e-06	0.875	WP_045931723.1
Select seq ref|WP_121738550.1|	FliC/FljB family flagellin [Alcaligenes aquatilis]	51.6	51.6	0.47	7e-06	0.875	WP_121738550.1
Select seq ref|WP_003804606.1|	FliC/FljB family flagellin [Alcaligenes faecalis]	51.6	51.6	0.47	7e-06	0.875	WP_003804606.1
Select seq ref|WP_088452397.1|	FliC/FljB family flagellin [Alcaligenes faecalis]	51.6	51.6	0.47	7e-06	0.875	WP_088452397.1
Select seq ref|WP_131071446.1|	FliC/FljB family flagellin [Alcaligenes faecalis]	51.2	51.2	0.47	8e-06	0.875	WP_131071446.1
Select seq ref|WP_137431350.1|	FliC/FljB family flagellin [Alcaligenes faecalis]	51.2	51.2	0.47	8e-06	0.875	WP_137431350.1
Select seq ref|WP_059317894.1|	flagellin FliC [Alcaligenes faecalis]	51.2	51.2	0.47	8e-06	0.875	WP_059317894.1
Select seq ref|WP_083053872.1|	FliC/FljB family flagellin [Alcaligenes faecalis]	53.1	53.1	0.5	2e-06	0.8529	WP_083053872.1
Select seq ref|WP_063692879.1|	FliC/FljB family flagellin [Alcaligenes faecalis]	53.1	53.1	0.5	2e-06	0.8529	WP_063692879.1
Select seq ref|WP_086068903.1|	FliC/FljB family flagellin [Alcaligenes faecalis]	52.8	52.8	0.5	2e-06	0.8529	WP_086068903.1
Select seq ref|WP_086060805.1|	FliC/FljB family flagellin [Alcaligenes faecalis]	52.8	52.8	0.5	2e-06	0.8529	WP_086060805.1
Select seq ref|WP_025203814.1|	hypothetical protein [Enterobacter ludwigii]	52	52	0.5	4e-06	0.8529	WP_025203814.1
Select seq ref|WP_045356863.1|	MULTISPECIES: hypothetical protein [Enterobacter cloacae complex]	52	52	0.5	4e-06	0.8529	WP_045356863.1
Select seq ref|WP_021446813.1|	flagellin [Alcaligenes sp. EGD-AK7]	52	52	0.5	4e-06	0.8529	WP_021446813.1
Select seq ref|WP_063618404.1|	hypothetical protein [Enterobacter cloacae]	52	52	0.5	5e-06	0.8529	WP_063618404.1
Select seq ref|WP_041909382.1|	MULTISPECIES: hypothetical protein [Enterobacter]	52	52	0.5	5e-06	0.8529	WP_041909382.1
Select seq ref|WP_063154953.1|	MULTISPECIES: hypothetical protein [Enterobacter]	52	52	0.5	5e-06	0.8529	WP_063154953.1
Select seq ref|WP_049000131.1|	hypothetical protein [Enterobacter bugandensis]	52	52	0.5	5e-06	0.8529	WP_049000131.1
Select seq ref|WP_057524015.1|	hypothetical protein [Salmonella enterica]	48.9	85.9	0.75	8e-06	0.8438	WP_057524015.1
Select seq ref|WP_047593219.1|	hypothetical protein [Salmonella enterica]	48.5	85.5	0.75	8e-06	0.8438	WP_047593219.1
Select seq ref|WP_050947555.1|	hypothetical protein [Salmonella enterica]	48.5	85.1	0.75	9e-06	0.8438	WP_050947555.1
Select seq ref|WP_020979019.1|	hypothetical protein [Salmonella enterica]	48.5	85.5	0.75	9e-06	0.8438	WP_020979019.1
Select seq ref|WP_053870710.1|	hypothetical protein [Salmonella enterica]	48.1	85.1	0.75	1e-05	0.8438	WP_053870710.1
Select seq ref|WP_072099797.1|	flagellin [Salmonella enterica]	48.1	84.7	0.75	1e-05	0.8438	WP_072099797.1
Select seq ref|WP_045718920.1|	hypothetical protein [Salmonella enterica]	48.5	85.5	0.75	1e-05	0.8438	WP_045718920.1
Select seq ref|WP_053871380.1|	hypothetical protein [Salmonella enterica]	48.1	85.1	0.75	1e-05	0.8438	WP_053871380.1
Select seq ref|WP_079779839.1|	flagellin [Salmonella enterica]	48.5	85.5	0.75	1e-05	0.8438	WP_079779839.1
Select seq ref|WP_046346504.1|	hypothetical protein [Salmonella enterica]	48.1	85.1	0.75	1e-05	0.8438	WP_046346504.1
Select seq ref|WP_053871248.1|	hypothetical protein [Salmonella enterica]	48.1	85.1	0.75	1e-05	0.8438	WP_053871248.1
Select seq ref|WP_050960766.1|	hypothetical protein [Salmonella enterica]	48.1	85.1	0.75	1e-05	0.8438	WP_050960766.1
Select seq ref|WP_001738913.1|	flagellin [Salmonella enterica]	48.1	85.1	0.75	1e-05	0.8438	WP_001738913.1
Select seq ref|WP_046341121.1|	flagellin [Salmonella enterica]	48.5	85.1	0.75	1e-05	0.8438	WP_046341121.1
Select seq ref|WP_047594943.1|	flagellin [Salmonella enterica]	48.1	84.7	0.75	1e-05	0.8438	WP_047594943.1
Select seq ref|WP_000079783.1|	hypothetical protein [Salmonella enterica]	48.5	85.1	0.75	1e-05	0.8438	WP_000079783.1
Select seq ref|WP_123362926.1|	flagellin FliC [Enterobacter sp. BIGb0359]	50.8	50.8	0.47	1e-05	0.8438	WP_123362926.1
Select seq ref|WP_077946916.1|	flagellin [Salmonella enterica]	48.1	48.1	0.47	1e-05	0.8438	WP_077946916.1
Select seq ref|WP_000079782.1|	hypothetical protein [Salmonella enterica]	48.1	84.7	0.75	1e-05	0.8438	WP_000079782.1
Select seq ref|WP_072098185.1|	flagellin [Salmonella enterica]	48.5	85.1	0.75	1e-05	0.8438	WP_072098185.1
Select seq ref|WP_046594791.1|	flagellin [Salmonella enterica]	48.1	84.7	0.75	1e-05	0.8438	WP_046594791.1
Select seq ref|WP_023206825.1|	flagellin [Salmonella enterica]	48.5	85.1	0.75	1e-05	0.8438	WP_023206825.1
Select seq ref|WP_077951446.1|	flagellin [Salmonella enterica]	48.1	48.1	0.47	1e-05	0.8438	WP_077951446.1
Select seq ref|WP_072098429.1|	flagellin [Salmonella enterica]	48.5	85.1	0.75	1e-05	0.8438	WP_072098429.1
Select seq ref|WP_038807979.1|	flagellin [Salmonella enterica]	48.1	84.7	0.75	1e-05	0.8438	WP_038807979.1
Select seq ref|WP_023251197.1|	flagellin [Salmonella enterica]	48.5	85.1	0.75	2e-05	0.8438	WP_023251197.1
Select seq ref|WP_059179629.1|	hypothetical protein [Lelliottia amnigena]	50.4	50.4	0.47	2e-05	0.8438	WP_059179629.1
Select seq ref|WP_057524511.1|	hypothetical protein [Salmonella enterica]	48.5	85.5	0.75	2e-05	0.8438	WP_057524511.1
Select seq ref|WP_014170721.1|	hypothetical protein [Enterobacter ludwigii]	50.4	50.4	0.47	2e-05	0.8438	WP_014170721.1
Select seq ref|WP_131488540.1|	flagellin FliC [Lelliottia amnigena]	50.4	50.4	0.47	2e-05	0.8438	WP_131488540.1
Select seq ref|WP_023183374.1|	flagellin [Salmonella enterica]	48.5	85.1	0.75	2e-05	0.8438	WP_023183374.1
Select seq ref|WP_023325563.1|	hypothetical protein [Enterobacter roggenkampii]	50.4	50.4	0.47	2e-05	0.8438	WP_023325563.1
Select seq ref|WP_047652381.1|	MULTISPECIES: hypothetical protein [Enterobacter]	50.4	50.4	0.47	2e-05	0.8438	WP_047652381.1
Select seq ref|WP_063215596.1|	MULTISPECIES: hypothetical protein [Enterobacter cloacae complex]	50.4	50.4	0.47	2e-05	0.8438	WP_063215596.1
Select seq ref|WP_020883343.1|	MULTISPECIES: hypothetical protein [Enterobacter]	50.4	50.4	0.47	2e-05	0.8438	WP_020883343.1
Select seq ref|WP_023618406.1|	MULTISPECIES: hypothetical protein [Enterobacter]	50.4	50.4	0.47	2e-05	0.8438	WP_023618406.1
Select seq ref|WP_079956906.1|	flagellin [Salmonella enterica]	48.5	85.1	0.75	2e-05	0.8438	WP_079956906.1
Select seq ref|WP_000079786.1|	flagellin [Salmonella enterica]	48.5	85.1	0.75	2e-05	0.8438	WP_000079786.1
Select seq ref|WP_064326592.1|	hypothetical protein [Lelliottia amnigena]	50.4	50.4	0.47	2e-05	0.8438	WP_064326592.1
Select seq ref|WP_047074061.1|	hypothetical protein [Enterobacter roggenkampii]	50.4	50.4	0.47	2e-05	0.8438	WP_047074061.1
Select seq ref|WP_097641120.1|	flagellin FliC [Cronobacter sakazakii]	50.8	50.8	0.5	1e-05	0.8235	WP_097641120.1
Select seq ref|WP_007756211.1|	hypothetical protein [Cronobacter dublinensis]	50.8	50.8	0.5	1e-05	0.8235	WP_007756211.1
Select seq ref|WP_105685488.1|	flagellin FliC [Cronobacter dublinensis]	50.4	50.4	0.5	1e-05	0.8235	WP_105685488.1
Select seq ref|WP_032972596.1|	hypothetical protein [Cronobacter malonaticus]	50.4	50.4	0.5	1e-05	0.8235	WP_032972596.1
Select seq ref|WP_097647999.1|	flagellin FliC [Cronobacter sakazakii]	50.4	50.4	0.5	1e-05	0.8235	WP_097647999.1
Select seq ref|WP_004386801.1|	hypothetical protein [Cronobacter sakazakii]	50.4	50.4	0.5	1e-05	0.8235	WP_004386801.1
Select seq ref|WP_054625873.1|	hypothetical protein [Cronobacter sakazakii]	50.4	50.4	0.5	1e-05	0.8235	WP_054625873.1
Select seq ref|WP_105613940.1|	flagellin FliC [Cronobacter malonaticus]	50.1	50.1	0.5	1e-05	0.8235	WP_105613940.1
Select seq ref|WP_105634206.1|	flagellin FliC [Cronobacter dublinensis]	50.4	50.4	0.5	1e-05	0.8235	WP_105634206.1
Select seq ref|WP_063264534.1|	hypothetical protein [Cronobacter sakazakii]	50.4	50.4	0.5	1e-05	0.8235	WP_063264534.1
Select seq ref|WP_115185102.1|	flagellin FliC [Cronobacter universalis]	50.4	50.4	0.5	2e-05	0.8235	WP_115185102.1
Select seq ref|WP_038871040.1|	hypothetical protein [Cronobacter dublinensis]	50.4	50.4	0.5	2e-05	0.8235	WP_038871040.1
Select seq ref|WP_007769644.1|	MULTISPECIES: hypothetical protein [Cronobacter]	50.4	50.4	0.5	2e-05	0.8235	WP_007769644.1
Select seq ref|WP_105662936.1|	flagellin FliC [Cronobacter dublinensis]	50.4	50.4	0.5	2e-05	0.8235	WP_105662936.1
Select seq ref|WP_038862178.1|	hypothetical protein [Cronobacter muytjensii]	50.4	50.4	0.5	2e-05	0.8235	WP_038862178.1
Select seq ref|WP_007776089.1|	MULTISPECIES: hypothetical protein [Cronobacter]	50.4	50.4	0.5	2e-05	0.8235	WP_007776089.1
Select seq ref|WP_054628543.1|	hypothetical protein [Cronobacter sakazakii]	50.4	50.4	0.5	2e-05	0.8235	WP_054628543.1
Select seq ref|WP_007668398.1|	hypothetical protein [Cronobacter condimenti]	50.4	50.4	0.5	2e-05	0.8235	WP_007668398.1
Select seq ref|WP_105577102.1|	flagellin FliC [Cronobacter sakazakii]	50.4	50.4	0.5	2e-05	0.8235	WP_105577102.1
Select seq ref|WP_105573537.1|	flagellin FliC [Cronobacter sakazakii]	50.4	50.4	0.5	2e-05	0.8235	WP_105573537.1
Select seq ref|WP_038880134.1|	hypothetical protein [Cronobacter sakazakii]	50.4	50.4	0.5	2e-05	0.8235	WP_038880134.1
Select seq ref|WP_080818099.1|	hypothetical protein [Cronobacter sakazakii]	50.4	50.4	0.5	2e-05	0.8235	WP_080818099.1
Select seq ref|WP_032988406.1|	MULTISPECIES: hypothetical protein [Cronobacter]	50.4	50.4	0.5	2e-05	0.8235	WP_032988406.1
Select seq ref|WP_067431609.1|	hypothetical protein [Erwinia gerundensis]	50.4	50.4	0.5	2e-05	0.8235	WP_067431609.1
Select seq ref|WP_014728601.1|	hypothetical protein [Cronobacter sakazakii]	50.4	50.4	0.5	2e-05	0.8235	WP_014728601.1
Select seq ref|WP_097604924.1|	flagellin FliC [Cronobacter sakazakii]	50.4	50.4	0.5	2e-05	0.8235	WP_097604924.1
Select seq ref|WP_075183945.1|	hypothetical protein [Cronobacter sakazakii]	50.4	50.4	0.5	2e-05	0.8235	WP_075183945.1
Select seq ref|WP_054625131.1|	hypothetical protein [Cronobacter sakazakii]	50.4	50.4	0.5	2e-05	0.8235	WP_054625131.1
Select seq ref|WP_087599617.1|	flagellin FliC [Cronobacter sakazakii]	50.4	50.4	0.5	2e-05	0.8235	WP_087599617.1
Select seq ref|WP_080781048.1|	hypothetical protein [Cronobacter sakazakii]	50.4	50.4	0.5	2e-05	0.8235	WP_080781048.1
Select seq ref|WP_085037044.1|	flagellin [Cronobacter sakazakii]	50.4	50.4	0.5	2e-05	0.8235	WP_085037044.1
Select seq ref|WP_043682726.1|	flagellin [Castellaniella defragrans]	50.4	50.4	0.5	2e-05	0.7941	WP_043682726.1
Select seq ref|WP_014610987.1|	flagellin [Shewanella putrefaciens]	50.4	50.4	0.48	2e-05	0.75	WP_014610987.1
Select seq ref|WP_133635077.1|	FliC/FljB family flagellin [Halomonas ventosae]	50.4	50.4	0.58	2e-05	0.725	WP_133635077.1
Select seq ref|WP_048259615.1|	hypothetical protein [Pectobacterium peruviense]	67.4	126	0.76	2e-11	0.7143	WP_048259615.1
Select seq ref|WP_046599014.1|	flagellin [Salmonella enterica]	50.4	88.2	0.97	2e-05	0.5625	WP_046599014.1

## Sheet: P0A8T7
Table S4. Best matched identites of the individual proteins bound to the biosensor. Green highlight denotes match against E. coli. Yellow highlight denotes match against non-E. coli strains included for testing in this study
Select for downloading or viewing reports	Description	Max Score	Total Score	Query Cover	E value	Per. Ident	Accession
Select seq ref|WP_142352304.1|	hypothetical protein [Bacillus pumilus]	40.4	40.4	0.16	0.08	1	WP_142352304.1
Select seq ref|WP_101760304.1|	DNA-directed RNA polymerase subunit beta' [Oceanicoccus sp. KOV_DT_Chl]	43.1	82.8	0.78	0.025	0.4308	WP_101760304.1
Select seq ref|WP_044881979.1|	DNA-directed RNA polymerase subunit beta' [Neochlamydia sp. EPS4]	41.6	41.6	0.47	0.08	0.4211	WP_044881979.1
Select seq ref|WP_042244069.1|	DNA-directed RNA polymerase subunit beta' [Neochlamydia sp. S13]	41.6	41.6	0.47	0.082	0.4211	WP_042244069.1
Select seq ref|WP_039385533.1|	DNA-directed RNA polymerase subunit beta' [Neochlamydia sp. TUME1]	41.6	41.6	0.47	0.085	0.4211	WP_039385533.1
Select seq ref|WP_075882901.1|	DNA-directed RNA polymerase subunit beta' [Candidatus Protochlamydia sp. W-9]	41.6	41.6	0.47	0.086	0.4211	WP_075882901.1
Select seq ref|WP_021756771.1|	DNA-directed RNA polymerase subunit beta' [Chlamydia pecorum]	42	42	0.48	0.06	0.4138	WP_021756771.1
Select seq ref|WP_012263638.1|	DNA-directed RNA polymerase subunit beta' [Chlamydia trachomatis]	42	42	0.48	0.06	0.4138	WP_012263638.1
Select seq ref|WP_024010950.1|	DNA-directed RNA polymerase subunit beta' [Chlamydia pecorum]	42	42	0.48	0.06	0.4138	WP_024010950.1
Select seq ref|WP_013713059.1|	DNA-directed RNA polymerase subunit beta' [Chlamydia pecorum]	42	42	0.48	0.06	0.4138	WP_013713059.1
Select seq ref|WP_009873719.1|	DNA-directed RNA polymerase subunit beta' [Chlamydia trachomatis]	42	42	0.48	0.06	0.4138	WP_009873719.1
Select seq ref|WP_020967700.1|	DNA-directed RNA polymerase subunit beta' [Chlamydia trachomatis]	42	42	0.48	0.06	0.4138	WP_020967700.1
Select seq ref|WP_012728103.1|	DNA-directed RNA polymerase subunit beta' [Chlamydia trachomatis]	42	42	0.48	0.061	0.4138	WP_012728103.1
Select seq ref|WP_020915924.1|	DNA-directed RNA polymerase subunit beta' [Chlamydia trachomatis]	42	42	0.48	0.061	0.4138	WP_020915924.1
Select seq ref|WP_050866609.1|	DNA-directed RNA polymerase subunit beta' [Chlamydia trachomatis]	42	42	0.48	0.061	0.4138	WP_050866609.1
Select seq ref|WP_015506058.1|	DNA-directed RNA polymerase subunit beta' [Chlamydia trachomatis]	42	42	0.48	0.061	0.4138	WP_015506058.1
Select seq ref|WP_009871661.1|	DNA-directed RNA polymerase subunit beta' [Chlamydia trachomatis]	42	42	0.48	0.061	0.4138	WP_009871661.1
Select seq ref|WP_020966709.1|	DNA-directed RNA polymerase subunit beta' [Chlamydia trachomatis]	42	42	0.48	0.061	0.4138	WP_020966709.1
Select seq ref|WP_083588477.1|	DNA-directed RNA polymerase subunit beta' [Chlamydia trachomatis]	42	42	0.48	0.062	0.4138	WP_083588477.1
Select seq ref|WP_069587101.1|	DNA-directed RNA polymerase subunit beta' [Chlamydia trachomatis]	42	42	0.48	0.062	0.4138	WP_069587101.1
Select seq ref|WP_012727876.1|	DNA-directed RNA polymerase subunit beta' [Chlamydia trachomatis]	42	42	0.48	0.062	0.4138	WP_012727876.1
Select seq ref|WP_020966966.1|	DNA-directed RNA polymerase subunit beta' [Chlamydia trachomatis]	42	42	0.48	0.062	0.4138	WP_020966966.1
Select seq ref|WP_139414508.1|	DNA-directed RNA polymerase subunit beta' [Chlamydia abortus]	42	42	0.48	0.063	0.4138	WP_139414508.1
Select seq ref|WP_014541251.1|	DNA-directed RNA polymerase subunit beta' [Chlamydia trachomatis]	42	42	0.48	0.063	0.4138	WP_014541251.1
Select seq ref|WP_009873101.1|	DNA-directed RNA polymerase subunit beta' [Chlamydia trachomatis]	42	42	0.48	0.063	0.4138	WP_009873101.1
Select seq ref|WP_069568425.1|	DNA-directed RNA polymerase subunit beta' [Chlamydia trachomatis]	42	42	0.48	0.063	0.4138	WP_069568425.1
Select seq ref|WP_024011100.1|	DNA-directed RNA polymerase subunit beta' [Chlamydia pecorum]	42	42	0.48	0.063	0.4138	WP_024011100.1
Select seq ref|WP_014736647.1|	DNA-directed RNA polymerase subunit beta' [Chlamydia trachomatis]	42	42	0.48	0.063	0.4138	WP_014736647.1
Select seq ref|WP_010230914.1|	DNA-directed RNA polymerase subunit beta' [Chlamydia muridarum]	42	42	0.48	0.063	0.4138	WP_010230914.1
Select seq ref|WP_082198777.1|	DNA-directed RNA polymerase subunit beta' [Chlamydia suis]	42	42	0.48	0.063	0.4138	WP_082198777.1
Select seq ref|WP_009872551.1|	DNA-directed RNA polymerase subunit beta' [Chlamydia trachomatis]	42	42	0.48	0.063	0.4138	WP_009872551.1
Select seq ref|WP_080122205.1|	DNA-directed RNA polymerase subunit beta' [Chlamydia suis]	42	42	0.48	0.063	0.4138	WP_080122205.1
Select seq ref|WP_057184870.1|	DNA-directed RNA polymerase subunit beta' [Chlamydia trachomatis]	42	42	0.48	0.063	0.4138	WP_057184870.1
Select seq ref|WP_013747386.1|	DNA-directed RNA polymerase subunit beta' [Chlamydia psittaci]	42	42	0.48	0.064	0.4138	WP_013747386.1
Select seq ref|WP_014943920.1|	DNA-directed RNA polymerase subunit beta' [Chlamydia psittaci]	42	42	0.48	0.064	0.4138	WP_014943920.1
Select seq ref|WP_011006647.1|	DNA-directed RNA polymerase subunit beta' [Chlamydia caviae]	42	42	0.48	0.064	0.4138	WP_011006647.1
Select seq ref|WP_021828479.1|	DNA-directed RNA polymerase subunit beta' [Chlamydia gallinacea]	42	42	0.48	0.064	0.4138	WP_021828479.1
Select seq ref|WP_011097243.1|	DNA-directed RNA polymerase subunit beta' [Chlamydia abortus]	42	42	0.48	0.065	0.4138	WP_011097243.1
Select seq ref|WP_006343356.1|	DNA-directed RNA polymerase subunit beta' [Chlamydia psittaci]	42	42	0.48	0.065	0.4138	WP_006343356.1
Select seq ref|WP_035406184.1|	DNA-directed RNA polymerase subunit beta' [Chlamydia suis]	42	42	0.48	0.065	0.4138	WP_035406184.1
Select seq ref|WP_014946134.1|	DNA-directed RNA polymerase subunit beta' [Chlamydia psittaci]	42	42	0.48	0.066	0.4138	WP_014946134.1
Select seq ref|WP_014944566.1|	DNA-directed RNA polymerase subunit beta' [Chlamydia psittaci]	42	42	0.48	0.066	0.4138	WP_014944566.1
Select seq ref|WP_131743627.1|	DNA-directed RNA polymerase subunit beta' [Chlamydia buteonis]	42	42	0.48	0.066	0.4138	WP_131743627.1
Select seq ref|WP_127345258.1|	DNA-directed RNA polymerase subunit beta' [Chlamydia psittaci]	42	42	0.48	0.066	0.4138	WP_127345258.1
Select seq ref|WP_086380256.1|	DNA-directed RNA polymerase subunit beta' [Chlamydia abortus]	42	42	0.48	0.066	0.4138	WP_086380256.1
Select seq ref|WP_080123723.1|	DNA-directed RNA polymerase subunit beta' [Chlamydia suis]	42	42	0.48	0.066	0.4138	WP_080123723.1
Select seq ref|WP_055349068.1|	DNA-directed RNA polymerase subunit beta' [Chlamydia trachomatis]	42	42	0.48	0.066	0.4138	WP_055349068.1
Select seq ref|WP_117274454.1|	DNA-directed RNA polymerase subunit beta' [Chlamydia sp. S15-834C]	42	42	0.48	0.066	0.4138	WP_117274454.1
Select seq ref|WP_006344277.1|	DNA-directed RNA polymerase subunit beta' [Chlamydia abortus]	42	42	0.48	0.066	0.4138	WP_006344277.1
Select seq ref|WP_014945588.1|	DNA-directed RNA polymerase subunit beta' [Chlamydia psittaci]	42	42	0.48	0.066	0.4138	WP_014945588.1
Select seq ref|WP_020356365.1|	DNA-directed RNA polymerase subunit beta' [Chlamydia psittaci]	42	42	0.48	0.066	0.4138	WP_020356365.1
Select seq ref|WP_020359285.1|	DNA-directed RNA polymerase subunit beta' [Chlamydia avium]	42	42	0.48	0.066	0.4138	WP_020359285.1
Select seq ref|WP_139415219.1|	DNA-directed RNA polymerase subunit beta' [Chlamydia abortus]	42	42	0.48	0.067	0.4138	WP_139415219.1
Select seq ref|WP_072667796.1|	DNA-directed RNA polymerase subunit beta' [Chlamydia abortus]	42	42	0.48	0.067	0.4138	WP_072667796.1
Select seq ref|WP_080123006.1|	DNA-directed RNA polymerase subunit beta' [Chlamydia suis]	42	42	0.48	0.067	0.4138	WP_080123006.1
Select seq ref|WP_014945186.1|	DNA-directed RNA polymerase subunit beta' [Chlamydia psittaci]	42	42	0.48	0.068	0.4138	WP_014945186.1
Select seq ref|WP_066482554.1|	DNA-directed RNA polymerase subunit beta' [Chlamydia sp. 2742-308]	42	42	0.48	0.07	0.4138	WP_066482554.1
Select seq ref|WP_011457873.1|	DNA-directed RNA polymerase subunit beta' [Chlamydia felis]	42	42	0.48	0.071	0.4138	WP_011457873.1
Select seq ref|WP_108896239.1|	DNA-directed RNA polymerase subunit beta' [Chlamydia sp. H15-1957-10C]	42	42	0.48	0.072	0.4138	WP_108896239.1
Select seq ref|WP_020370394.1|	DNA-directed RNA polymerase subunit beta' [Chlamydia ibidis]	42	42	0.48	0.072	0.4138	WP_020370394.1
Select seq ref|WP_010895278.1|	DNA-directed RNA polymerase subunit beta' [Chlamydia pneumoniae]	41.6	41.6	0.48	0.073	0.4138	WP_010895278.1
Select seq ref|WP_100934024.1|	DNA-directed RNA polymerase subunit beta' [Candidatus Chlamydia corallus]	41.6	41.6	0.48	0.073	0.4138	WP_100934024.1
Select seq ref|WP_010882732.1|	DNA-directed RNA polymerase subunit beta' [Chlamydia pneumoniae]	41.6	41.6	0.48	0.074	0.4138	WP_010882732.1
Select seq ref|WP_014517988.1|	DNA-directed RNA polymerase subunit beta' [Chlamydia pneumoniae]	41.6	41.6	0.48	0.075	0.4138	WP_014517988.1
Select seq ref|WP_015873264.1|	DNA-directed RNA polymerase subunit beta' [Candidatus Hamiltonella defensa]	42.4	123	0.77	0.053	0.3814	WP_015873264.1
Select seq ref|WP_052980842.1|	DNA-directed RNA polymerase subunit beta' [Shigella sonnei]	42	121	0.77	0.054	0.3814	WP_052980842.1
Select seq ref|WP_016857112.1|	DNA-directed RNA polymerase subunit beta' [Candidatus Hamiltonella defensa]	42	122	0.77	0.054	0.3814	WP_016857112.1
Select seq ref|WP_100096305.1|	DNA-directed RNA polymerase subunit beta' [Candidatus Hamiltonella defensa]	42	122	0.77	0.054	0.3814	WP_100096305.1
Select seq ref|WP_044794213.1|	DNA-directed RNA polymerase subunit beta' [Escherichia coli]	42	121	0.77	0.055	0.3814	WP_044794213.1
Select seq ref|WP_116979808.1|	DNA-directed RNA polymerase subunit beta' [Escherichia coli]	42	121	0.77	0.057	0.3814	WP_116979808.1
Select seq ref|WP_043991063.1|	DNA-directed RNA polymerase subunit beta' [Salmonella enterica]	42	121	0.77	0.057	0.3814	WP_043991063.1
Select seq ref|WP_139383392.1|	DNA-directed RNA polymerase subunit beta' [Salmonella enterica]	42	121	0.77	0.058	0.3814	WP_139383392.1
Select seq ref|WP_101170222.1|	DNA-directed RNA polymerase subunit beta' [Klebsiella pneumoniae]	42	121	0.77	0.058	0.3814	WP_101170222.1
Select seq ref|WP_097377145.1|	DNA-directed RNA polymerase subunit beta' [Salmonella enterica]	42	121	0.77	0.058	0.3814	WP_097377145.1
Select seq ref|WP_122653817.1|	DNA-directed RNA polymerase subunit beta' [Escherichia coli]	42	121	0.77	0.059	0.3814	WP_122653817.1
Select seq ref|WP_095055959.1|	DNA-directed RNA polymerase subunit beta' [Salmonella enterica]	42	121	0.77	0.059	0.3814	WP_095055959.1
Select seq ref|WP_031623683.1|	DNA-directed RNA polymerase subunit beta' [Salmonella enterica]	42	121	0.77	0.06	0.3814	WP_031623683.1
Select seq ref|WP_094965872.1|	DNA-directed RNA polymerase subunit beta' [Klebsiella pneumoniae]	42	121	1	0.06	0.3814	WP_094965872.1
Select seq ref|WP_125286236.1|	DNA-directed RNA polymerase subunit beta' [Klebsiella pneumoniae]	42	123	0.77	0.06	0.3814	WP_125286236.1
Select seq ref|WP_080159655.1|	DNA-directed RNA polymerase subunit beta' [Salmonella enterica]	42	121	0.77	0.06	0.3814	WP_080159655.1
Select seq ref|WP_043993250.1|	DNA-directed RNA polymerase subunit beta' [Salmonella enterica]	42	121	0.77	0.061	0.3814	WP_043993250.1
Select seq ref|WP_074153198.1|	DNA-directed RNA polymerase subunit beta' [Escherichia coli]	42	121	0.77	0.061	0.3814	WP_074153198.1
Select seq ref|WP_050190708.1|	DNA-directed RNA polymerase subunit beta' [Salmonella enterica]	42	121	0.77	0.061	0.3814	WP_050190708.1
Select seq ref|WP_112320257.1|	DNA-directed RNA polymerase subunit beta' [Salmonella enterica]	42	121	0.77	0.061	0.3814	WP_112320257.1
Select seq ref|WP_016581496.1|	DNA-directed RNA polymerase subunit beta' [Yersinia pestis]	42	121	0.77	0.061	0.3814	WP_016581496.1
Select seq ref|WP_115041413.1|	DNA-directed RNA polymerase subunit beta' [Yersinia pseudotuberculosis]	42	122	0.77	0.061	0.3814	WP_115041413.1
Select seq ref|WP_000519653.1|	DNA-directed RNA polymerase subunit beta' [Salmonella enterica]	42	121	0.77	0.062	0.3814	WP_000519653.1
Select seq ref|WP_052962517.1|	DNA-directed RNA polymerase subunit beta' [Shigella sonnei]	42	121	0.77	0.062	0.3814	WP_052962517.1
Select seq ref|WP_049266579.1|	DNA-directed RNA polymerase subunit beta' [Salmonella enterica]	42	121	0.77	0.062	0.3814	WP_049266579.1
Select seq ref|WP_043991564.1|	DNA-directed RNA polymerase subunit beta' [Salmonella enterica]	42	121	0.77	0.063	0.3814	WP_043991564.1
Select seq ref|WP_016584702.1|	DNA-directed RNA polymerase subunit beta' [Yersinia pestis]	42	121	0.77	0.063	0.3814	WP_016584702.1
Select seq ref|WP_080206784.1|	DNA-directed RNA polymerase subunit beta' [Salmonella enterica]	42	121	0.77	0.064	0.3814	WP_080206784.1
Select seq ref|WP_129430914.1|	DNA-directed RNA polymerase subunit beta' [Escherichia coli]	42	121	0.77	0.065	0.3814	WP_129430914.1
Select seq ref|WP_080071348.1|	DNA-directed RNA polymerase subunit beta' [Salmonella enterica]	42	121	0.77	0.065	0.3814	WP_080071348.1
Select seq ref|WP_097116948.1|	DNA-directed RNA polymerase subunit beta' [Salmonella enterica]	42	121	0.77	0.067	0.3814	WP_097116948.1

## Sheet: P06612
Table S4. Best matched identites of the individual proteins bound to the biosensor. Green highlight denotes match against E. coli. Yellow highlight denotes match against non-E. coli strains included for testing in this study
Select for downloading or viewing reports	Description	Max Score	Total Score	Query Cover	E value	Per. Ident	Accession
Select seq ref|WP_013247607.1|	type I DNA topoisomerase [Nitrospira defluvii]	46.6	46.6	0.8	0.0001	0.8214	WP_013247607.1
Select seq ref|WP_080878685.1|	type I DNA topoisomerase [Nitrospira sp. ND1]	46.6	46.6	0.8	0.0001	0.8214	WP_080878685.1
Select seq ref|WP_134798233.1|	type I DNA topoisomerase [Shigella flexneri]	45.8	45.8	0.8	0.0001	0.75	WP_134798233.1
Select seq ref|WP_119164766.1|	type I DNA topoisomerase [Shigella flexneri]	45.8	45.8	0.8	0.0001	0.75	WP_119164766.1
Select seq ref|WP_089576709.1|	type I DNA topoisomerase [Escherichia coli]	45.8	45.8	0.8	0.0002	0.75	WP_089576709.1
Select seq ref|WP_087474371.1|	type I DNA topoisomerase [Nitrospira cf. moscoviensis SBR1015]	45.4	45.4	0.8	0.0002	0.7857	WP_087474371.1
Select seq ref|WP_053378666.1|	type I DNA topoisomerase [Nitrospira moscoviensis]	45.4	45.4	0.8	0.0002	0.7857	WP_053378666.1
Select seq ref|WP_121987929.1|	type I DNA topoisomerase [Nitrospira lenta]	45.4	45.4	0.8	0.0002	0.7857	WP_121987929.1
Select seq ref|WP_086425082.1|	type I DNA topoisomerase [Nitrospira cf. moscoviensis SBR1015]	45.4	45.4	0.8	0.0002	0.7857	WP_086425082.1
Select seq ref|WP_090742241.1|	type I DNA topoisomerase [Candidatus Nitrospira nitrosa]	45.4	45.4	0.8	0.0002	0.7857	WP_090742241.1
Select seq ref|WP_090900588.1|	type I DNA topoisomerase [Candidatus Nitrospira nitrificans]	45.4	45.4	0.8	0.0002	0.7857	WP_090900588.1
Select seq ref|WP_109765152.1|	type I DNA topoisomerase [Pleionea mediterranea]	45.1	45.1	0.8	0.0003	0.75	WP_109765152.1
Select seq ref|WP_064602781.1|	type I DNA topoisomerase [Photobacterium sp. J15]	45.1	45.1	0.8	0.0003	0.75	WP_064602781.1
Select seq ref|WP_036798385.1|	type I DNA topoisomerase [Photobacterium marinum]	45.1	45.1	0.8	0.0003	0.75	WP_036798385.1
Select seq ref|WP_061028440.1|	type I DNA topoisomerase [Aliivibrio wodanis]	45.1	45.1	0.8	0.0003	0.75	WP_061028440.1
Select seq ref|WP_122035256.1|	type I DNA topoisomerase [Aliivibrio sp. EL58]	45.1	45.1	0.8	0.0003	0.75	WP_122035256.1
Select seq ref|WP_061037048.1|	type I DNA topoisomerase [Aliivibrio wodanis]	45.1	45.1	0.8	0.0003	0.75	WP_061037048.1
Select seq ref|WP_105054491.1|	type I DNA topoisomerase [Aliivibrio sifiae]	45.1	45.1	0.8	0.0003	0.75	WP_105054491.1
Select seq ref|WP_065591660.1|	MULTISPECIES: type I DNA topoisomerase [Aliivibrio]	45.1	45.1	0.8	0.0003	0.75	WP_065591660.1
Select seq ref|WP_060990672.1|	MULTISPECIES: type I DNA topoisomerase [Aliivibrio]	45.1	45.1	0.8	0.0003	0.75	WP_060990672.1
Select seq ref|WP_102471397.1|	MULTISPECIES: type I DNA topoisomerase [Vibrio]	45.1	45.1	0.8	0.0003	0.75	WP_102471397.1
Select seq ref|WP_017025175.1|	type I DNA topoisomerase [Vibrio rumoiensis]	45.1	45.1	0.8	0.0003	0.75	WP_017025175.1
Select seq ref|WP_045101789.1|	type I DNA topoisomerase [Aliivibrio wodanis]	45.1	45.1	0.8	0.0003	0.75	WP_045101789.1
Select seq ref|WP_073603097.1|	type I DNA topoisomerase [Vibrio aerogenes]	45.1	45.1	0.8	0.0003	0.75	WP_073603097.1
Select seq ref|WP_063643776.1|	type I DNA topoisomerase [Aliivibrio fischeri]	45.1	45.1	0.8	0.0003	0.75	WP_063643776.1
Select seq ref|WP_045976753.1|	type I DNA topoisomerase [Vibrio neptunius]	45.1	45.1	0.8	0.0003	0.75	WP_045976753.1
Select seq ref|WP_135353423.1|	type I DNA topoisomerase [Aliivibrio fischeri]	45.1	45.1	0.8	0.0003	0.75	WP_135353423.1
Select seq ref|WP_011261684.1|	type I DNA topoisomerase [Aliivibrio fischeri]	45.1	45.1	0.8	0.0003	0.75	WP_011261684.1
Select seq ref|WP_012533245.1|	type I DNA topoisomerase [Aliivibrio fischeri]	45.1	45.1	0.8	0.0003	0.75	WP_012533245.1
Select seq ref|WP_130043393.1|	type I DNA topoisomerase [Aliivibrio finisterrensis]	45.1	45.1	0.8	0.0003	0.75	WP_130043393.1
Select seq ref|WP_063651334.1|	type I DNA topoisomerase [Aliivibrio fischeri]	45.1	45.1	0.8	0.0003	0.75	WP_063651334.1
Select seq ref|WP_133415370.1|	type I DNA topoisomerase [Aliivibrio fischeri]	45.1	45.1	0.8	0.0003	0.75	WP_133415370.1
Select seq ref|WP_017020611.1|	type I DNA topoisomerase [Aliivibrio logei]	45.1	45.1	0.8	0.0003	0.75	WP_017020611.1
Select seq ref|WP_048689919.1|	type I DNA topoisomerase [Catenovulum maritimum]	45.1	45.1	0.8	0.0003	0.75	WP_048689919.1
Select seq ref|WP_130048618.1|	type I DNA topoisomerase [Aliivibrio finisterrensis]	45.1	45.1	0.8	0.0003	0.75	WP_130048618.1
Select seq ref|WP_012549908.1|	type I DNA topoisomerase [Aliivibrio salmonicida]	45.1	45.1	0.8	0.0003	0.75	WP_012549908.1
Select seq ref|WP_065603446.1|	type I DNA topoisomerase [Aliivibrio fischeri]	45.1	45.1	0.8	0.0003	0.75	WP_065603446.1
Select seq ref|WP_063662441.1|	type I DNA topoisomerase [Aliivibrio fischeri]	45.1	45.1	0.8	0.0003	0.75	WP_063662441.1
Select seq ref|WP_005418793.1|	type I DNA topoisomerase [Aliivibrio fischeri]	45.1	45.1	0.8	0.0003	0.75	WP_005418793.1
Select seq ref|WP_015465019.1|	type I DNA topoisomerase [Psychromonas sp. CNPT3]	45.1	45.1	0.8	0.0003	0.75	WP_015465019.1
Select seq ref|WP_128784147.1|	type I DNA topoisomerase [Photobacterium sp. BEI 247]	45.1	45.1	0.8	0.0004	0.75	WP_128784147.1
Select seq ref|WP_073586620.1|	type I DNA topoisomerase [Vibrio quintilis]	45.1	45.1	0.8	0.0004	0.75	WP_073586620.1
Select seq ref|WP_080886621.1|	type I DNA topoisomerase [Nitrospira japonica]	45.1	45.1	0.8	0.0004	0.7857	WP_080886621.1
Select seq ref|WP_025643987.1|	MULTISPECIES: type I DNA topoisomerase [Psychrobacter]	44.7	44.7	0.8	0.0004	0.75	WP_025643987.1
Select seq ref|WP_020444080.1|	type I DNA topoisomerase [Psychrobacter sp. G]	44.7	44.7	0.8	0.0004	0.75	WP_020444080.1
Select seq ref|WP_011514221.1|	type I DNA topoisomerase [Psychrobacter cryohalolentis]	44.7	44.7	0.8	0.0004	0.75	WP_011514221.1
Select seq ref|WP_011280924.1|	type I DNA topoisomerase [Psychrobacter arcticus]	44.7	44.7	0.8	0.0004	0.75	WP_011280924.1
Select seq ref|WP_062535441.1|	type I DNA topoisomerase [Psychrobacter urativorans]	44.7	44.7	0.8	0.0004	0.75	WP_062535441.1
Select seq ref|WP_075106812.1|	type I DNA topoisomerase [Psychrobacter sp. C 20.9]	44.7	44.7	0.8	0.0004	0.75	WP_075106812.1
Select seq ref|WP_068407179.1|	type I DNA topoisomerase [Psychrobacter sp. SHUES1]	44.7	44.7	0.8	0.0004	0.75	WP_068407179.1
Select seq ref|WP_025651317.1|	MULTISPECIES: type I DNA topoisomerase [Psychrobacter]	44.7	44.7	0.8	0.0004	0.75	WP_025651317.1
Select seq ref|WP_102077651.1|	type I DNA topoisomerase [Psychrobacter sp. Sarcosine-02u-2]	44.7	44.7	0.8	0.0004	0.75	WP_102077651.1
Select seq ref|WP_093070500.1|	type I DNA topoisomerase [Psychrobacter pacificensis]	44.7	44.7	0.8	0.0004	0.75	WP_093070500.1
Select seq ref|WP_055125172.1|	type I DNA topoisomerase [Psychrobacter glacincola]	44.7	44.7	0.8	0.0004	0.75	WP_055125172.1
Select seq ref|WP_071002152.1|	type I DNA topoisomerase [Psychrobacter sp. AntiMn-1]	44.7	44.7	0.8	0.0004	0.75	WP_071002152.1
Select seq ref|WP_058024113.1|	type I DNA topoisomerase [Psychrobacter piscatorii]	44.7	44.7	0.8	0.0004	0.75	WP_058024113.1
Select seq ref|WP_082638045.1|	type I DNA topoisomerase [Psychrobacter sp. ENNN9_III]	44.7	44.7	0.8	0.0004	0.75	WP_082638045.1
Select seq ref|WP_083606059.1|	type I DNA topoisomerase [Psychrobacter sp. Cmf 22.2]	44.7	44.7	0.8	0.0004	0.75	WP_083606059.1
Select seq ref|WP_096065064.1|	type I DNA topoisomerase [Psychrobacter sp. FDAARGOS_221]	44.7	44.7	0.8	0.0004	0.75	WP_096065064.1
Select seq ref|WP_037031563.1|	type I DNA topoisomerase [Psychrobacter phenylpyruvicus]	44.7	44.7	0.8	0.0004	0.75	WP_037031563.1
Select seq ref|WP_110816081.1|	type I DNA topoisomerase [Psychrobacter sp. YP14]	44.7	44.7	0.8	0.0004	0.75	WP_110816081.1
Select seq ref|WP_068036926.1|	type I DNA topoisomerase [Psychrobacter sp. P11G5]	44.7	44.7	0.8	0.0004	0.75	WP_068036926.1
Select seq ref|WP_068328715.1|	type I DNA topoisomerase [Psychrobacter sp. P2G3]	44.7	44.7	0.8	0.0004	0.75	WP_068328715.1
Select seq ref|WP_007394281.1|	type I DNA topoisomerase [Psychrobacter sp. 1501(2011)]	44.7	44.7	0.8	0.0004	0.75	WP_007394281.1
Select seq ref|WP_101205177.1|	MULTISPECIES: type I DNA topoisomerase [Psychrobacter]	44.7	44.7	0.8	0.0004	0.75	WP_101205177.1
Select seq ref|WP_102092238.1|	type I DNA topoisomerase [Psychrobacter sp. 4Bb]	44.7	44.7	0.8	0.0004	0.75	WP_102092238.1
Select seq ref|WP_011959681.1|	type I DNA topoisomerase [Psychrobacter sp. PRwf-1]	44.7	44.7	0.8	0.0004	0.75	WP_011959681.1
Select seq ref|WP_102093051.1|	type I DNA topoisomerase [Psychrobacter sp. MES7-P7E]	44.7	44.7	0.8	0.0004	0.75	WP_102093051.1
Select seq ref|WP_135510726.1|	type I DNA topoisomerase [Oceanospirillales bacterium]	44.7	44.7	0.8	0.0004	0.75	WP_135510726.1
Select seq ref|WP_094751953.1|	type I DNA topoisomerase [Psychromonas sp. CD1]	44.7	44.7	0.8	0.0004	0.75	WP_094751953.1
Select seq ref|WP_101081808.1|	type I DNA topoisomerase [Psychromonas sp. Urea-02u-13]	44.7	44.7	0.8	0.0004	0.75	WP_101081808.1
Select seq ref|WP_060491670.1|	type I DNA topoisomerase [Psychrobacter sp. P11F6]	44.7	44.7	0.8	0.0004	0.75	WP_060491670.1
Select seq ref|WP_110923169.1|	type I DNA topoisomerase [Psychrobacter fozii]	44.7	44.7	0.8	0.0004	0.75	WP_110923169.1
Select seq ref|WP_021812978.1|	type I DNA topoisomerase [Psychrobacter aquaticus]	44.7	44.7	0.8	0.0005	0.75	WP_021812978.1
Select seq ref|WP_095569969.1|	type I DNA topoisomerase [Psychrobacter sp. JB193]	44.7	44.7	0.8	0.0005	0.75	WP_095569969.1
Select seq ref|WP_099046707.1|	MULTISPECIES: type I DNA topoisomerase [Psychrobacter]	44.7	44.7	0.8	0.0005	0.75	WP_099046707.1
Select seq ref|WP_087814415.1|	type I DNA topoisomerase [Psychrobacter cibarius]	44.7	44.7	0.8	0.0005	0.75	WP_087814415.1
Select seq ref|WP_057761218.1|	type I DNA topoisomerase [Psychrobacter sp. P11G3]	44.7	44.7	0.8	0.0005	0.75	WP_057761218.1
Select seq ref|WP_109589450.1|	type I DNA topoisomerase [Psychrobacter immobilis]	44.7	44.7	0.8	0.0005	0.75	WP_109589450.1
Select seq ref|WP_077447604.1|	type I DNA topoisomerase [Psychrobacter pasteurii]	44.7	44.7	0.8	0.0005	0.75	WP_077447604.1
Select seq ref|WP_077450239.1|	type I DNA topoisomerase [Psychrobacter piechaudii]	44.7	44.7	0.8	0.0005	0.75	WP_077450239.1
Select seq ref|WP_022941114.1|	type I DNA topoisomerase [Psychromonas hadalis]	44.7	44.7	0.8	0.0005	0.75	WP_022941114.1
Select seq ref|WP_079693105.1|	type I DNA topoisomerase [Psychrobacter sp. DAB_AL43B]	44.7	44.7	0.8	0.0005	0.75	WP_079693105.1
Select seq ref|WP_105243965.1|	type I DNA topoisomerase [Psychrobacter sp. Marseille-P5312]	44.7	44.7	0.8	0.0005	0.75	WP_105243965.1
Select seq ref|WP_010196278.1|	type I DNA topoisomerase [Psychrobacter sp. PAMC 21119]	44.7	44.7	0.8	0.0005	0.75	WP_010196278.1
Select seq ref|WP_087039886.1|	type I DNA topoisomerase [Psychrobacter sp. JB385]	44.7	44.7	0.8	0.0005	0.75	WP_087039886.1
Select seq ref|WP_019672570.1|	type I DNA topoisomerase [Psychrobacter lutiphocae]	44.7	44.7	0.8	0.0005	0.75	WP_019672570.1
Select seq ref|WP_070134325.1|	type I DNA topoisomerase [Candidatus Erwinia dacicola]	44.7	44.7	0.8	0.0005	0.7143	WP_070134325.1
Select seq ref|WP_114700505.1|	type I DNA topoisomerase [Psychrobacter proteolyticus]	44.7	44.7	0.8	0.0005	0.75	WP_114700505.1
Select seq ref|WP_100749819.1|	type I DNA topoisomerase [Psychrobacter sp. L7]	44.7	44.7	0.8	0.0005	0.75	WP_100749819.1
Select seq ref|WP_075100558.1|	type I DNA topoisomerase [Psychrobacter sp. Rd 27.2]	44.3	44.3	0.8	0.0005	0.75	WP_075100558.1
Select seq ref|WP_136674703.1|	type I DNA topoisomerase [Marinifilum sp. JC120]	44.3	44.3	0.8	0.0006	0.75	WP_136674703.1
Select seq ref|WP_027720616.1|	type I DNA topoisomerase [Desulfovibrio zosterae]	44.3	44.3	0.8	0.0006	0.75	WP_027720616.1
Select seq ref|WP_019622251.1|	type I DNA topoisomerase [Amphritea japonica]	44.3	44.3	0.8	0.0006	0.75	WP_019622251.1
Select seq ref|WP_015335647.1|	type I DNA topoisomerase [Desulfovibrio hydrothermalis]	44.3	44.3	0.8	0.0006	0.75	WP_015335647.1
Select seq ref|WP_015853669.1|	type I DNA topoisomerase [Desulfovibrio salexigens]	44.3	44.3	0.8	0.0006	0.75	WP_015853669.1

## Sheet: P0AES4
Table S4. Best matched identites of the individual proteins bound to the biosensor. Green highlight denotes match against E. coli. Yellow highlight denotes match against non-E. coli strains included for testing in this study
Select for downloading or viewing reports	Description	Max Score	Total Score	Query Cover	E value	Per. Ident	Accession
Select seq ref|WP_063106593.1|	DNA gyrase subunit A [Escherichia coli]	47.4	128	1	0.0001	1	WP_063106593.1
Select seq ref|WP_063073049.1|	hypothetical protein [Escherichia coli]	47.4	128	1	0.0001	1	WP_063073049.1
Select seq ref|WP_119163505.1|	DNA gyrase subunit A [Shigella flexneri]	47.4	128	1	0.0001	1	WP_119163505.1
Select seq ref|WP_119179895.1|	DNA gyrase subunit A [Shigella flexneri]	47.4	128	1	0.0001	1	WP_119179895.1
Select seq ref|WP_113222124.1|	DNA topoisomerase (ATP-hydrolyzing) subunit A [Escherichia coli]	47.4	128	1	0.0001	1	WP_113222124.1
Select seq ref|WP_032349779.1|	DNA gyrase subunit A [Escherichia coli]	47.4	128	1	0.0001	1	WP_032349779.1
Select seq ref|WP_135383277.1|	MULTISPECIES: DNA gyrase subunit A [Escherichia]	47.4	128	1	0.0001	1	WP_135383277.1
Select seq ref|WP_072110788.1|	hypothetical protein [Shigella sonnei]	47.4	128	1	0.0001	1	WP_072110788.1
Select seq ref|WP_001661530.1|	DNA gyrase/topoisomerase IV, subunit A family protein [Escherichia coli]	47.4	128	1	0.0001	1	WP_001661530.1
Select seq ref|WP_071447811.1|	DNA gyrase subunit A [Escherichia coli]	47.4	128	1	0.0001	1	WP_071447811.1
Select seq ref|WP_128875051.1|	DNA topoisomerase (ATP-hydrolyzing) subunit A [Shigella dysenteriae]	47.4	128	1	0.0001	1	WP_128875051.1
Select seq ref|WP_052968471.1|	DNA gyrase subunit A [Shigella sonnei]	47.4	128	1	0.0001	1	WP_052968471.1
Select seq ref|WP_124831365.1|	DNA topoisomerase (ATP-hydrolyzing) subunit A [Escherichia coli]	47.4	128	1	0.0001	1	WP_124831365.1
Select seq ref|WP_136756813.1|	DNA gyrase subunit A [Escherichia coli]	47.4	128	1	0.0001	1	WP_136756813.1
Select seq ref|WP_040082097.1|	DNA topoisomerase (ATP-hydrolyzing) subunit A [Escherichia coli]	47.4	128	1	0.0001	1	WP_040082097.1
Select seq ref|WP_136159493.1|	DNA topoisomerase (ATP-hydrolyzing) subunit A [Escherichia coli]	47.4	128	1	0.0001	1	WP_136159493.1
Select seq ref|WP_096549038.1|	DNA topoisomerase (ATP-hydrolyzing) subunit A [Escherichia coli]	47.4	128	1	0.0001	1	WP_096549038.1
Select seq ref|WP_137514998.1|	DNA topoisomerase (ATP-hydrolyzing) subunit A [Escherichia coli]	47.4	128	1	0.0001	1	WP_137514998.1
Select seq ref|WP_139528675.1|	DNA topoisomerase (ATP-hydrolyzing) subunit A [Escherichia coli]	47.4	128	1	0.0001	1	WP_139528675.1
Select seq ref|WP_069198164.1|	DNA topoisomerase (ATP-hydrolyzing) subunit A [Escherichia coli]	47.4	128	1	0.0001	1	WP_069198164.1
Select seq ref|WP_033803927.1|	DNA topoisomerase (ATP-hydrolyzing) subunit A [Escherichia coli]	47.4	128	1	0.0001	1	WP_033803927.1
Select seq ref|WP_032209456.1|	DNA topoisomerase (ATP-hydrolyzing) subunit A [Escherichia coli]	47.4	128	1	0.0001	1	WP_032209456.1
Select seq ref|WP_115204533.1|	DNA topoisomerase (ATP-hydrolyzing) subunit A [Escherichia coli]	47.4	128	1	0.0001	1	WP_115204533.1
Select seq ref|WP_052920807.1|	DNA topoisomerase (ATP-hydrolyzing) subunit A [Escherichia coli]	47.4	128	1	0.0001	1	WP_052920807.1
Select seq ref|WP_097506112.1|	DNA topoisomerase (ATP-hydrolyzing) subunit A [Escherichia coli]	47.4	128	1	0.0001	1	WP_097506112.1
Select seq ref|WP_112793706.1|	DNA topoisomerase (ATP-hydrolyzing) subunit A [Escherichia coli]	47.4	128	1	0.0001	1	WP_112793706.1
Select seq ref|WP_134715094.1|	DNA topoisomerase (ATP-hydrolyzing) subunit A [Escherichia coli]	47.4	129	1	0.0001	1	WP_134715094.1
Select seq ref|WP_053270466.1|	DNA topoisomerase (ATP-hydrolyzing) subunit A [Escherichia coli]	47.4	128	1	0.0001	1	WP_053270466.1
Select seq ref|WP_097483203.1|	DNA topoisomerase (ATP-hydrolyzing) subunit A [Escherichia coli]	47.4	128	1	0.0001	1	WP_097483203.1
Select seq ref|WP_095373894.1|	DNA topoisomerase (ATP-hydrolyzing) subunit A [Escherichia coli]	47.4	128	1	0.0001	1	WP_095373894.1
Select seq ref|WP_104726631.1|	DNA topoisomerase (ATP-hydrolyzing) subunit A [Escherichia coli]	47.4	128	1	0.0001	1	WP_104726631.1
Select seq ref|WP_137544281.1|	DNA topoisomerase (ATP-hydrolyzing) subunit A [Escherichia coli]	47.4	128	1	0.0001	1	WP_137544281.1
Select seq ref|WP_072291155.1|	DNA gyrase subunit A [Escherichia coli]	47.4	128	1	0.0001	1	WP_072291155.1
Select seq ref|WP_032207164.1|	DNA topoisomerase (ATP-hydrolyzing) subunit A [Escherichia coli]	47.4	128	1	0.0001	1	WP_032207164.1
Select seq ref|WP_040061548.1|	MULTISPECIES: DNA topoisomerase (ATP-hydrolyzing) subunit A [Shigella]	47.4	128	1	0.0001	1	WP_040061548.1
Select seq ref|WP_096958296.1|	DNA topoisomerase (ATP-hydrolyzing) subunit A [Escherichia coli]	47.4	128	1	0.0001	1	WP_096958296.1
Select seq ref|WP_063101818.1|	DNA topoisomerase (ATP-hydrolyzing) subunit A [Escherichia coli]	47.4	128	1	0.0001	1	WP_063101818.1
Select seq ref|WP_029701249.1|	MULTISPECIES: DNA topoisomerase (ATP-hydrolyzing) subunit A [Enterobacteriaceae]	47.4	128	1	0.0001	1	WP_029701249.1
Select seq ref|WP_139499526.1|	DNA topoisomerase (ATP-hydrolyzing) subunit A [Escherichia coli]	47.4	128	1	0.0001	1	WP_139499526.1
Select seq ref|WP_089578033.1|	DNA topoisomerase (ATP-hydrolyzing) subunit A [Escherichia coli]	47.4	128	1	0.0001	1	WP_089578033.1
Select seq ref|WP_112338211.1|	DNA topoisomerase (ATP-hydrolyzing) subunit A [Shigella flexneri]	47.4	128	1	0.0001	1	WP_112338211.1
Select seq ref|WP_105075704.1|	DNA topoisomerase (ATP-hydrolyzing) subunit A [Escherichia coli]	47.4	128	1	0.0001	1	WP_105075704.1
Select seq ref|WP_096996770.1|	DNA topoisomerase (ATP-hydrolyzing) subunit A [Escherichia coli]	47.4	129	1	0.0001	1	WP_096996770.1
Select seq ref|WP_113897915.1|	DNA topoisomerase (ATP-hydrolyzing) subunit A [Escherichia coli]	47.4	128	1	0.0001	1	WP_113897915.1
Select seq ref|WP_106404580.1|	DNA topoisomerase (ATP-hydrolyzing) subunit A [Escherichia coli]	47.4	128	1	0.0001	1	WP_106404580.1
Select seq ref|WP_072657427.1|	DNA topoisomerase (ATP-hydrolyzing) subunit A [Escherichia coli]	47.4	128	1	0.0001	1	WP_072657427.1
Select seq ref|WP_112924939.1|	DNA topoisomerase (ATP-hydrolyzing) subunit A [Escherichia coli]	47.4	128	1	0.0001	1	WP_112924939.1
Select seq ref|WP_111969948.1|	DNA topoisomerase (ATP-hydrolyzing) subunit A [Escherichia coli]	47.4	128	1	0.0001	1	WP_111969948.1
Select seq ref|WP_097508795.1|	DNA topoisomerase (ATP-hydrolyzing) subunit A [Escherichia coli]	47.4	128	1	0.0001	1	WP_097508795.1
Select seq ref|WP_053886268.1|	DNA topoisomerase (ATP-hydrolyzing) subunit A [Escherichia coli]	47.4	128	1	0.0001	1	WP_053886268.1
Select seq ref|WP_072643734.1|	DNA topoisomerase (ATP-hydrolyzing) subunit A [Escherichia coli]	47.4	128	1	0.0001	1	WP_072643734.1
Select seq ref|WP_096842180.1|	DNA topoisomerase (ATP-hydrolyzing) subunit A [Escherichia coli]	47.4	128	1	0.0001	1	WP_096842180.1
Select seq ref|WP_072662336.1|	DNA topoisomerase (ATP-hydrolyzing) subunit A [Escherichia coli]	47.4	128	1	0.0001	1	WP_072662336.1
Select seq ref|WP_126125577.1|	DNA topoisomerase (ATP-hydrolyzing) subunit A [Escherichia coli]	47.4	128	1	0.0001	1	WP_126125577.1
Select seq ref|WP_105283843.1|	DNA topoisomerase (ATP-hydrolyzing) subunit A [Escherichia fergusonii]	47.4	129	1	0.0001	1	WP_105283843.1
Select seq ref|WP_112886979.1|	DNA topoisomerase (ATP-hydrolyzing) subunit A [Escherichia coli]	47.4	128	1	0.0001	1	WP_112886979.1
Select seq ref|WP_089640567.1|	DNA topoisomerase (ATP-hydrolyzing) subunit A [Escherichia coli]	47.4	128	1	0.0001	1	WP_089640567.1
Select seq ref|WP_021569512.1|	DNA topoisomerase (ATP-hydrolyzing) subunit A [Escherichia coli]	47.4	129	1	0.0001	1	WP_021569512.1
Select seq ref|WP_118393869.1|	DNA topoisomerase (ATP-hydrolyzing) subunit A [Escherichia coli]	47.4	128	1	0.0001	1	WP_118393869.1
Select seq ref|WP_073511538.1|	DNA topoisomerase (ATP-hydrolyzing) subunit A [Escherichia coli]	47.4	128	1	0.0001	1	WP_073511538.1
Select seq ref|WP_124880499.1|	DNA topoisomerase (ATP-hydrolyzing) subunit A [Escherichia coli]	47.4	128	1	0.0001	1	WP_124880499.1
Select seq ref|WP_103687629.1|	DNA topoisomerase (ATP-hydrolyzing) subunit A [Escherichia coli]	47.4	128	1	0.0001	1	WP_103687629.1
Select seq ref|WP_130560164.1|	DNA topoisomerase (ATP-hydrolyzing) subunit A [Escherichia coli]	47.4	128	1	0.0001	1	WP_130560164.1
Select seq ref|WP_106482577.1|	DNA topoisomerase (ATP-hydrolyzing) subunit A [Escherichia coli]	47.4	128	1	0.0001	1	WP_106482577.1
Select seq ref|WP_126670956.1|	DNA topoisomerase (ATP-hydrolyzing) subunit A [Escherichia coli]	47.4	128	1	0.0001	1	WP_126670956.1
Select seq ref|WP_078230659.1|	DNA topoisomerase (ATP-hydrolyzing) subunit A [Escherichia coli]	47.4	128	1	0.0001	1	WP_078230659.1
Select seq ref|WP_126655649.1|	DNA topoisomerase (ATP-hydrolyzing) subunit A [Escherichia coli]	47.4	128	1	0.0001	1	WP_126655649.1
Select seq ref|WP_075631223.1|	DNA topoisomerase (ATP-hydrolyzing) subunit A [Escherichia coli]	47.4	128	1	0.0001	1	WP_075631223.1
Select seq ref|WP_119773883.1|	DNA topoisomerase (ATP-hydrolyzing) subunit A [Escherichia coli]	47.4	128	1	0.0001	1	WP_119773883.1
Select seq ref|WP_063080428.1|	DNA topoisomerase (ATP-hydrolyzing) subunit A [Escherichia coli]	47.4	128	1	0.0001	1	WP_063080428.1
Select seq ref|WP_103723627.1|	DNA topoisomerase (ATP-hydrolyzing) subunit A [Escherichia coli]	47.4	128	1	0.0001	1	WP_103723627.1
Select seq ref|WP_025763977.1|	DNA topoisomerase (ATP-hydrolyzing) subunit A [Shigella flexneri]	47.4	128	1	0.0001	1	WP_025763977.1
Select seq ref|WP_130560033.1|	DNA topoisomerase (ATP-hydrolyzing) subunit A [Escherichia coli]	47.4	128	1	0.0001	1	WP_130560033.1
Select seq ref|WP_139500502.1|	DNA topoisomerase (ATP-hydrolyzing) subunit A [Escherichia coli]	47.4	128	1	0.0001	1	WP_139500502.1
Select seq ref|WP_109543513.1|	DNA topoisomerase (ATP-hydrolyzing) subunit A [Escherichia coli]	47.4	128	1	0.0001	1	WP_109543513.1
Select seq ref|WP_054579746.1|	DNA topoisomerase (ATP-hydrolyzing) subunit A [Escherichia coli]	47.4	128	1	0.0001	1	WP_054579746.1
Select seq ref|WP_100183832.1|	DNA topoisomerase (ATP-hydrolyzing) subunit A [Escherichia coli]	47.4	128	1	0.0001	1	WP_100183832.1
Select seq ref|WP_112928989.1|	DNA topoisomerase (ATP-hydrolyzing) subunit A [Escherichia coli]	47.4	128	1	0.0001	1	WP_112928989.1
Select seq ref|WP_053891618.1|	DNA topoisomerase (ATP-hydrolyzing) subunit A [Escherichia coli]	47.4	129	1	0.0001	1	WP_053891618.1
Select seq ref|WP_089703333.1|	DNA topoisomerase (ATP-hydrolyzing) subunit A [Escherichia coli]	47.4	128	1	0.0001	1	WP_089703333.1
Select seq ref|WP_061354533.1|	DNA topoisomerase (ATP-hydrolyzing) subunit A [Escherichia coli]	47.4	128	1	0.0001	1	WP_061354533.1
Select seq ref|WP_136810996.1|	DNA topoisomerase (ATP-hydrolyzing) subunit A [Escherichia coli]	47.4	128	1	0.0001	1	WP_136810996.1
Select seq ref|WP_137546983.1|	DNA topoisomerase (ATP-hydrolyzing) subunit A [Escherichia coli]	47.4	128	1	0.0001	1	WP_137546983.1
Select seq ref|WP_063096580.1|	DNA topoisomerase (ATP-hydrolyzing) subunit A [Escherichia coli]	47.4	128	1	0.0001	1	WP_063096580.1
Select seq ref|WP_053287188.1|	DNA topoisomerase (ATP-hydrolyzing) subunit A [Escherichia coli]	47.4	128	1	0.0001	1	WP_053287188.1
Select seq ref|WP_094282757.1|	DNA topoisomerase (ATP-hydrolyzing) subunit A [Escherichia coli]	47.4	128	1	0.0001	1	WP_094282757.1
Select seq ref|WP_096247606.1|	DNA topoisomerase (ATP-hydrolyzing) subunit A [Escherichia coli]	47.4	128	1	0.0001	1	WP_096247606.1
Select seq ref|WP_023281371.1|	DNA topoisomerase (ATP-hydrolyzing) subunit A [Escherichia coli]	47.4	128	1	0.0001	1	WP_023281371.1
Select seq ref|WP_109058268.1|	DNA topoisomerase (ATP-hydrolyzing) subunit A [Escherichia coli]	47.4	128	1	0.0001	1	WP_109058268.1
Select seq ref|WP_024222013.1|	DNA topoisomerase (ATP-hydrolyzing) subunit A [Escherichia coli]	47.4	128	1	0.0001	1	WP_024222013.1
Select seq ref|WP_052913344.1|	DNA topoisomerase (ATP-hydrolyzing) subunit A [Escherichia coli]	47.4	128	1	0.0001	1	WP_052913344.1
Select seq ref|WP_053286552.1|	MULTISPECIES: DNA topoisomerase (ATP-hydrolyzing) subunit A [Enterobacteriaceae]	47.4	128	1	0.0001	1	WP_053286552.1
Select seq ref|WP_112032834.1|	DNA topoisomerase (ATP-hydrolyzing) subunit A [Escherichia coli]	47.4	128	1	0.0001	1	WP_112032834.1
Select seq ref|WP_097408070.1|	DNA topoisomerase (ATP-hydrolyzing) subunit A [Escherichia coli]	47.4	129	1	0.0001	1	WP_097408070.1
Select seq ref|WP_053903870.1|	DNA topoisomerase (ATP-hydrolyzing) subunit A [Escherichia coli]	47.4	128	1	0.0001	1	WP_053903870.1
Select seq ref|WP_038999743.1|	DNA gyrase subunit A [Escherichia coli]	47.4	128	1	0.0001	1	WP_038999743.1
Select seq ref|WP_112868396.1|	DNA topoisomerase (ATP-hydrolyzing) subunit A [Escherichia coli]	48.1	132	1	7e-05	0.6042	WP_112868396.1
Select seq ref|WP_074466130.1|	DNA gyrase subunit A [Escherichia coli]	44.7	44.7	0.83	0.0001	0.5833	WP_074466130.1
Select seq ref|WP_101214047.1|	DNA topoisomerase (ATP-hydrolyzing) subunit A [Alteromonadales bacterium alter-6D02]	47.4	115	1	0.0001	0.5333	WP_101214047.1

## Sheet: P0A6Y8
Table S4. Best matched identites of the individual proteins bound to the biosensor. Green highlight denotes match against E. coli. Yellow highlight denotes match against non-E. coli strains included for testing in this study
Select for downloading or viewing reports	Description	Max Score	Total Score	Query Cover	E value	Per. Ident	Accession
Select seq ref|WP_087897252.1|	Hsp70 family protein [Escherichia coli]	68.6	109	0.18	4e-11	1	WP_087897252.1
Select seq ref|WP_063120553.1|	molecular chaperone DnaK [Escherichia coli]	81.3	461	0.86	1e-13	0.4408	WP_063120553.1
Select seq ref|WP_126006887.1|	molecular chaperone DnaK [Alphaproteobacteria bacterium WS11]	81.3	256	0.79	1e-13	0.4234	WP_126006887.1
Select seq ref|WP_099537311.1|	molecular chaperone DnaK [Caulobacter sp. X]	77	217	0.79	4e-12	0.4203	WP_099537311.1
Select seq ref|WP_116490887.1|	molecular chaperone DnaK [Caulobacter radicis]	76.3	256	0.7	6e-12	0.4203	WP_116490887.1
Select seq ref|WP_109455173.1|	molecular chaperone DnaK [Caulobacter sp. 774]	76.3	256	0.7	6e-12	0.4203	WP_109455173.1
Select seq ref|WP_101720431.1|	molecular chaperone DnaK [Caulobacter zeae]	76.3	256	0.7	7e-12	0.4203	WP_101720431.1
Select seq ref|WP_116569349.1|	molecular chaperone DnaK [Caulobacter radicis]	76.3	256	0.7	7e-12	0.4203	WP_116569349.1
Select seq ref|WP_058347093.1|	molecular chaperone DnaK [Caulobacter vibrioides]	76.3	256	0.7	7e-12	0.4203	WP_058347093.1
Select seq ref|WP_004617404.1|	molecular chaperone DnaK [Caulobacter vibrioides]	75.9	214	0.79	8e-12	0.4203	WP_004617404.1
Select seq ref|WP_028039691.1|	molecular chaperone DnaK [Caulobacter sp. URHA0033]	74.7	213	0.79	2e-11	0.4203	WP_028039691.1
Select seq ref|WP_097140084.1|	molecular chaperone DnaK [Rhizobium subbaraonis]	81.3	298	0.79	1e-13	0.413	WP_097140084.1
Select seq ref|WP_102959529.1|	molecular chaperone DnaK [Mangrovicella endophytica]	79	223	0.79	9e-13	0.413	WP_102959529.1
Select seq ref|WP_035081230.1|	molecular chaperone DnaK [Caulobacter henricii]	78.2	217	0.79	1e-12	0.413	WP_035081230.1
Select seq ref|WP_089931000.1|	molecular chaperone DnaK [Caulobacter sp. UNC279MFTsu5.1]	78.2	217	0.79	1e-12	0.413	WP_089931000.1
Select seq ref|WP_019996008.1|	molecular chaperone DnaK [Aureimonas ureilytica]	75.9	221	0.79	9e-12	0.413	WP_019996008.1
Select seq ref|WP_082505791.1|	molecular chaperone DnaK [Aureimonas sp. Leaf324]	75.9	218	0.86	1e-11	0.413	WP_082505791.1
Select seq ref|WP_090962078.1|	molecular chaperone DnaK [Aureimonas phyllosphaerae]	75.1	218	0.79	1e-11	0.413	WP_090962078.1
Select seq ref|WP_132092981.1|	molecular chaperone DnaK [Caulobacter sp. BK020]	75.1	214	0.79	2e-11	0.413	WP_132092981.1
Select seq ref|WP_110118375.1|	MULTISPECIES: molecular chaperone DnaK [Caulobacter]	75.1	214	0.7	2e-11	0.413	WP_110118375.1
Select seq ref|WP_047413796.1|	molecular chaperone DnaK [Caulobacter sp. OV484]	74.7	175	0.7	2e-11	0.413	WP_047413796.1
Select seq ref|WP_010917900.1|	molecular chaperone DnaK [Caulobacter vibrioides]	74.7	255	0.7	2e-11	0.413	WP_010917900.1
Select seq ref|WP_062097461.1|	MULTISPECIES: molecular chaperone DnaK [Caulobacter]	74.7	174	0.7	2e-11	0.413	WP_062097461.1
Select seq ref|WP_066682261.1|	molecular chaperone DnaK [Caulobacter sp. CCH9-E1]	74.7	214	0.79	2e-11	0.413	WP_066682261.1
Select seq ref|WP_056055490.1|	MULTISPECIES: molecular chaperone DnaK [Caulobacter]	74.7	175	0.7	2e-11	0.413	WP_056055490.1
Select seq ref|WP_029010924.1|	molecular chaperone DnaK [Azospirillum halopraeferens]	74.3	177	0.7	3e-11	0.413	WP_029010924.1
Select seq ref|WP_099444316.1|	molecular chaperone DnaK [Caulobacter sp. BP25]	74.3	256	0.79	3e-11	0.413	WP_099444316.1
Select seq ref|WP_108506220.1|	MULTISPECIES: molecular chaperone DnaK [Caulobacter]	73.6	254	0.79	5e-11	0.413	WP_108506220.1
Select seq ref|WP_040959295.1|	molecular chaperone DnaK [Sinorhizobium fredii]	73.9	294	0.79	4e-11	0.4088	WP_040959295.1
Select seq ref|WP_112594613.1|	molecular chaperone DnaK [Rhizobiales bacterium]	77.4	257	0.73	3e-12	0.4058	WP_112594613.1
Select seq ref|WP_112616650.1|	molecular chaperone DnaK [Rhizobiales bacterium]	77.4	257	0.73	3e-12	0.4058	WP_112616650.1
Select seq ref|WP_029910214.1|	molecular chaperone DnaK [Caulobacter sp. UNC358MFTsu5.1]	77	216	0.79	3e-12	0.4058	WP_029910214.1
Select seq ref|WP_125159001.1|	molecular chaperone DnaK [Caulobacter sp. 602-1]	76.6	177	0.7	5e-12	0.4058	WP_125159001.1
Select seq ref|WP_013655042.1|	molecular chaperone DnaK [Polymorphum gilvum]	75.9	262	0.86	8e-12	0.4058	WP_013655042.1
Select seq ref|WP_062142489.1|	molecular chaperone DnaK [Caulobacter henricii]	74.7	295	0.79	2e-11	0.4058	WP_062142489.1
Select seq ref|WP_012284100.1|	molecular chaperone DnaK [Caulobacter sp. K31]	74.7	214	0.79	2e-11	0.4058	WP_012284100.1
Select seq ref|WP_019963763.1|	molecular chaperone DnaK [Pannonibacter phragmitetus]	74.3	351	0.94	3e-11	0.4058	WP_019963763.1
Select seq ref|WP_050473450.1|	molecular chaperone DnaK [Pannonibacter phragmitetus]	74.3	351	0.94	3e-11	0.4058	WP_050473450.1
Select seq ref|WP_122519030.1|	molecular chaperone DnaK [Pannonibacter phragmitetus]	74.3	351	0.94	3e-11	0.4058	WP_122519030.1
Select seq ref|WP_018093811.1|	MULTISPECIES: molecular chaperone DnaK [Sinorhizobium/Ensifer group]	74.3	298	0.79	3e-11	0.4058	WP_018093811.1
Select seq ref|WP_127513685.1|	molecular chaperone DnaK [Sinorhizobium meliloti]	74.3	298	0.79	3e-11	0.4058	WP_127513685.1
Select seq ref|WP_003531910.1|	MULTISPECIES: molecular chaperone DnaK [Rhizobiales]	73.9	298	0.79	3e-11	0.4058	WP_003531910.1
Select seq ref|WP_029961764.1|	molecular chaperone DnaK [Ensifer sp. USDA 6670]	73.9	297	0.79	3e-11	0.4058	WP_029961764.1
Select seq ref|WP_127701254.1|	molecular chaperone DnaK [Sinorhizobium meliloti]	73.9	298	0.79	3e-11	0.4058	WP_127701254.1
Select seq ref|WP_100669893.1|	molecular chaperone DnaK [Sinorhizobium meliloti]	73.9	297	0.79	4e-11	0.4058	WP_100669893.1
Select seq ref|WP_028011094.1|	MULTISPECIES: molecular chaperone DnaK [Sinorhizobium/Ensifer group]	73.9	297	0.79	4e-11	0.4058	WP_028011094.1
Select seq ref|WP_127664901.1|	molecular chaperone DnaK [Sinorhizobium meliloti]	73.9	256	0.73	4e-11	0.4058	WP_127664901.1
Select seq ref|WP_026203484.1|	molecular chaperone DnaK [Rhizobium giardinii]	77.8	253	0.79	2e-12	0.4052	WP_026203484.1
Select seq ref|WP_112851652.1|	molecular chaperone DnaK [Rhizobiales bacterium]	77.8	253	0.79	2e-12	0.4052	WP_112851652.1
Select seq ref|WP_071017982.1|	molecular chaperone DnaK [Ensifer sp. LCM 4579]	75.1	296	0.79	2e-11	0.4029	WP_071017982.1
Select seq ref|WP_034853400.1|	molecular chaperone DnaK [Ensifer sojae]	74.3	296	0.79	3e-11	0.4029	WP_034853400.1
Select seq ref|WP_069459917.1|	molecular chaperone DnaK [Ensifer alkalisoli]	74.3	296	0.79	3e-11	0.4029	WP_069459917.1
Select seq ref|WP_108001528.1|	molecular chaperone DnaK [Mycoplana dimorpha]	74.3	294	0.79	3e-11	0.4029	WP_108001528.1

## Sheet: P0A7Z4
Table S4. Best matched identites of the individual proteins bound to the biosensor. Green highlight denotes match against E. coli. Yellow highlight denotes match against non-E. coli strains included for testing in this study
Select for downloading or viewing reports	Description	Max Score	Total Score	Query Cover	E value	Per. Ident	Accession
Select seq ref|WP_039267425.1|	DNA-directed RNA polymerase subunit alpha [Enterobacter hormaechei]	73.9	135	0.78	4e-14	0.7308	WP_039267425.1
Select seq ref|WP_142924750.1|	DNA-directed RNA polymerase subunit alpha [Klebsiella pneumoniae]	73.6	73.6	0.54	4e-14	0.7308	WP_142924750.1
Select seq ref|WP_044859362.1|	DNA-directed RNA polymerase subunit alpha [Enterobacter ludwigii]	73.2	73.2	0.54	8e-14	0.7308	WP_044859362.1
Select seq ref|WP_085036629.1|	DNA-directed RNA polymerase subunit alpha [Cronobacter sakazakii]	73.9	134	0.78	9e-14	0.7308	WP_085036629.1
Select seq ref|WP_121784830.1|	DNA-directed RNA polymerase subunit alpha [Pseudomonas aeruginosa]	73.9	134	0.78	1e-13	0.7308	WP_121784830.1
Select seq ref|WP_102097800.1|	DNA-directed RNA polymerase subunit alpha [Klebsiella pneumoniae]	73.9	134	0.78	1e-13	0.7308	WP_102097800.1
Select seq ref|WP_136555447.1|	DNA-directed RNA polymerase subunit alpha [Klebsiella pneumoniae]	73.9	134	0.78	1e-13	0.7308	WP_136555447.1
Select seq ref|WP_112122251.1|	DNA-directed RNA polymerase subunit alpha [Listeria monocytogenes]	73.6	134	0.78	1e-13	0.7308	WP_112122251.1
Select seq ref|WP_040223145.1|	DNA-directed RNA polymerase subunit alpha [Klebsiella pneumoniae]	73.6	134	0.78	1e-13	0.7308	WP_040223145.1
Select seq ref|WP_115460411.1|	DNA-directed RNA polymerase subunit alpha [Enterobacillus tribolii]	73.9	133	0.78	2e-13	0.7308	WP_115460411.1
Select seq ref|WP_004846552.1|	MULTISPECIES: DNA-directed RNA polymerase subunit alpha [Hafniaceae]	73.9	133	0.78	2e-13	0.7308	WP_004846552.1
Select seq ref|WP_060437319.1|	DNA-directed RNA polymerase subunit alpha [Serratia marcescens]	73.9	135	0.78	2e-13	0.7308	WP_060437319.1
Select seq ref|WP_115667180.1|	DNA-directed RNA polymerase subunit alpha [Klebsiella pneumoniae]	73.9	134	0.78	2e-13	0.7308	WP_115667180.1
Select seq ref|WP_062868906.1|	MULTISPECIES: DNA-directed RNA polymerase subunit alpha [Enterobacterales]	73.9	134	0.78	2e-13	0.7308	WP_062868906.1
Select seq ref|WP_117040146.1|	DNA-directed RNA polymerase subunit alpha [Klebsiella pneumoniae]	73.9	134	0.78	2e-13	0.7308	WP_117040146.1
Select seq ref|WP_045324609.1|	DNA-directed RNA polymerase subunit alpha [Enterobacter hormaechei]	73.9	135	0.78	2e-13	0.7308	WP_045324609.1
Select seq ref|WP_049847026.1|	DNA-directed RNA polymerase subunit alpha [Trabulsiella odontotermitis]	73.9	134	0.78	2e-13	0.7308	WP_049847026.1
Select seq ref|WP_045895828.1|	DNA-directed RNA polymerase subunit alpha [Enterobacter hormaechei]	73.9	134	0.78	2e-13	0.7308	WP_045895828.1
Select seq ref|WP_048874424.1|	DNA-directed RNA polymerase subunit alpha [Enterobacter hormaechei]	73.6	134	0.78	2e-13	0.7308	WP_048874424.1
Select seq ref|WP_006817265.1|	MULTISPECIES: DNA-directed RNA polymerase subunit alpha [Enterobacteriaceae]	73.9	134	0.78	2e-13	0.7308	WP_006817265.1
Select seq ref|WP_134883654.1|	DNA-directed RNA polymerase subunit alpha [Klebsiella oxytoca]	73.9	134	0.78	2e-13	0.7308	WP_134883654.1
Select seq ref|WP_112879446.1|	MULTISPECIES: DNA-directed RNA polymerase subunit alpha [Photorhabdus]	73.9	134	0.78	2e-13	0.7308	WP_112879446.1
Select seq ref|WP_005290354.1|	MULTISPECIES: DNA-directed RNA polymerase subunit alpha [Edwardsiella]	73.9	133	0.78	2e-13	0.7308	WP_005290354.1
Select seq ref|WP_038269634.1|	MULTISPECIES: DNA-directed RNA polymerase subunit alpha [Xenorhabdus]	73.9	134	0.78	2e-13	0.7308	WP_038269634.1
Select seq ref|WP_086557669.1|	DNA-directed RNA polymerase subunit alpha [Klebsiella aerogenes]	73.9	134	0.78	2e-13	0.7308	WP_086557669.1
Select seq ref|WP_060461091.1|	DNA-directed RNA polymerase subunit alpha [Serratia marcescens]	73.9	134	0.78	2e-13	0.7308	WP_060461091.1
Select seq ref|WP_115465065.1|	DNA-directed RNA polymerase subunit alpha [Escherichia coli]	73.9	134	0.78	2e-13	0.7308	WP_115465065.1
Select seq ref|WP_138094398.1|	DNA-directed RNA polymerase subunit alpha [Izhakiella sp. KSNA2]	73.9	134	0.78	2e-13	0.7308	WP_138094398.1
Select seq ref|WP_115195719.1|	DNA-directed RNA polymerase subunit alpha [Klebsiella pneumoniae]	73.9	131	0.78	2e-13	0.7308	WP_115195719.1
Select seq ref|WP_078005003.1|	MULTISPECIES: DNA-directed RNA polymerase subunit alpha [Enterobacterales]	73.9	134	0.78	2e-13	0.7308	WP_078005003.1
Select seq ref|WP_128823908.1|	DNA-directed RNA polymerase subunit alpha [Yersinia rohdei]	73.9	134	0.78	2e-13	0.7308	WP_128823908.1
Select seq ref|WP_075183625.1|	DNA-directed RNA polymerase subunit alpha [Pantoea sp. 1.19]	73.9	134	0.78	2e-13	0.7308	WP_075183625.1
Select seq ref|WP_038158497.1|	DNA-directed RNA polymerase subunit alpha [Trabulsiella guamensis]	73.9	134	0.78	2e-13	0.7308	WP_038158497.1
Select seq ref|WP_032437324.1|	DNA-directed RNA polymerase subunit alpha [Klebsiella pneumoniae]	73.9	134	0.78	2e-13	0.7308	WP_032437324.1
Select seq ref|WP_134083277.1|	DNA-directed RNA polymerase subunit alpha [Klebsiella pneumoniae]	73.9	134	0.78	2e-13	0.7308	WP_134083277.1
Select seq ref|WP_050143876.1|	DNA-directed RNA polymerase subunit alpha [Yersinia enterocolitica]	73.9	134	0.78	2e-13	0.7308	WP_050143876.1
Select seq ref|WP_010847500.1|	DNA-directed RNA polymerase subunit alpha [Xenorhabdus nematophila]	73.9	134	0.78	2e-13	0.7308	WP_010847500.1
Select seq ref|WP_066749767.1|	DNA-directed RNA polymerase subunit alpha [Cosenzaea myxofaciens]	73.9	134	0.78	2e-13	0.7308	WP_066749767.1
Select seq ref|WP_103197506.1|	DNA-directed RNA polymerase subunit alpha [Klebsiella pneumoniae]	73.9	134	0.78	2e-13	0.7308	WP_103197506.1
Select seq ref|WP_002919219.1|	MULTISPECIES: DNA-directed RNA polymerase subunit alpha [Enterobacterales]	73.9	134	0.78	2e-13	0.7308	WP_002919219.1
Select seq ref|WP_004388623.1|	MULTISPECIES: DNA-directed RNA polymerase subunit alpha [Cronobacter]	73.9	134	0.78	2e-13	0.7308	WP_004388623.1
Select seq ref|WP_062779420.1|	DNA-directed RNA polymerase subunit alpha [Kluyvera intermedia]	73.9	133	0.78	2e-13	0.7308	WP_062779420.1
Select seq ref|WP_013204116.1|	MULTISPECIES: DNA-directed RNA polymerase subunit alpha [Erwinia]	73.9	134	0.78	2e-13	0.7308	WP_013204116.1
Select seq ref|WP_067709958.1|	MULTISPECIES: DNA-directed RNA polymerase subunit alpha [Enterobacterales]	73.9	134	0.78	2e-13	0.7308	WP_067709958.1
Select seq ref|WP_004875100.1|	DNA-directed RNA polymerase subunit alpha [Yersinia mollaretii]	73.9	134	0.78	2e-13	0.7308	WP_004875100.1
Select seq ref|WP_045889058.1|	DNA-directed RNA polymerase subunit alpha [Enterobacter asburiae]	73.9	133	0.78	2e-13	0.7308	WP_045889058.1
Select seq ref|WP_101416204.1|	DNA-directed RNA polymerase subunit alpha [Klebsiella variicola]	73.9	134	0.78	2e-13	0.7308	WP_101416204.1
Select seq ref|WP_086955016.1|	DNA-directed RNA polymerase subunit alpha [Xenorhabdus innexi]	73.9	134	0.78	2e-13	0.7308	WP_086955016.1
Select seq ref|WP_121926715.1|	DNA-directed RNA polymerase subunit alpha [Enterobacter hormaechei]	73.9	134	0.78	2e-13	0.7308	WP_121926715.1
Select seq ref|WP_023479415.1|	MULTISPECIES: DNA-directed RNA polymerase subunit alpha [Enterobacteriaceae]	73.9	134	0.78	2e-13	0.7308	WP_023479415.1
Select seq ref|WP_002438685.1|	MULTISPECIES: DNA-directed RNA polymerase subunit alpha [Enterobacterales]	73.9	134	0.78	2e-13	0.7308	WP_002438685.1
Select seq ref|WP_109949105.1|	DNA-directed RNA polymerase subunit alpha [Enterobacter hormaechei]	73.9	134	0.78	2e-13	0.7308	WP_109949105.1
Select seq ref|WP_076026136.1|	DNA-directed RNA polymerase subunit alpha [Klebsiella pneumoniae]	73.9	134	0.78	2e-13	0.7308	WP_076026136.1
Select seq ref|WP_056232411.1|	MULTISPECIES: DNA-directed RNA polymerase subunit alpha [Erwinia]	73.9	134	0.78	2e-13	0.7308	WP_056232411.1
Select seq ref|WP_125482788.1|	DNA-directed RNA polymerase subunit alpha [Klebsiella pneumoniae]	73.9	134	0.78	2e-13	0.7308	WP_125482788.1
Select seq ref|WP_112018397.1|	DNA-directed RNA polymerase subunit alpha [Enterobacter hormaechei]	73.9	134	0.78	2e-13	0.7308	WP_112018397.1
Select seq ref|WP_044704529.1|	MULTISPECIES: DNA-directed RNA polymerase subunit alpha [Enterobacter cloacae complex]	73.9	134	0.78	2e-13	0.7308	WP_044704529.1
Select seq ref|WP_016947117.1|	DNA-directed RNA polymerase subunit alpha [Klebsiella pneumoniae]	73.9	134	0.78	2e-13	0.7308	WP_016947117.1
Select seq ref|WP_011148772.1|	MULTISPECIES: DNA-directed RNA polymerase subunit alpha [Photorhabdus]	73.9	134	0.78	2e-13	0.7308	WP_011148772.1
Select seq ref|WP_131874963.1|	DNA-directed RNA polymerase subunit alpha [Klebsiella pneumoniae]	73.9	134	0.78	2e-13	0.7308	WP_131874963.1
Select seq ref|WP_024524906.1|	DNA-directed RNA polymerase subunit alpha [Edwardsiella hoshinae]	73.9	133	0.78	2e-13	0.7308	WP_024524906.1
Select seq ref|WP_099140441.1|	DNA-directed RNA polymerase subunit alpha [Xenorhabdus kozodoii]	73.9	134	0.78	2e-13	0.7308	WP_099140441.1
Select seq ref|WP_061892043.1|	DNA-directed RNA polymerase subunit alpha [Klebsiella pneumoniae]	73.9	134	0.78	2e-13	0.7308	WP_061892043.1
Select seq ref|WP_038192832.1|	DNA-directed RNA polymerase subunit alpha [Xenorhabdus bovienii]	73.9	134	0.78	2e-13	0.7308	WP_038192832.1
Select seq ref|WP_012990477.1|	DNA-directed RNA polymerase subunit alpha [Xenorhabdus bovienii]	73.9	134	0.78	2e-13	0.7308	WP_012990477.1
Select seq ref|WP_134869823.1|	DNA-directed RNA polymerase subunit alpha [Enterobacter cloacae]	73.9	134	0.78	2e-13	0.7308	WP_134869823.1
Select seq ref|WP_032655322.1|	DNA-directed RNA polymerase subunit alpha [Enterobacter sp. MGH 33]	73.9	134	0.78	2e-13	0.7308	WP_032655322.1
Select seq ref|WP_047961668.1|	DNA-directed RNA polymerase subunit alpha [Xenorhabdus khoisanae]	73.9	134	0.78	2e-13	0.7308	WP_047961668.1
Select seq ref|WP_048286224.1|	DNA-directed RNA polymerase subunit alpha [Klebsiella pneumoniae]	73.9	134	0.78	2e-13	0.7308	WP_048286224.1
Select seq ref|WP_138976199.1|	DNA-directed RNA polymerase subunit alpha [Klebsiella pneumoniae]	73.6	73.6	0.54	2e-13	0.7308	WP_138976199.1
Select seq ref|WP_007702470.1|	DNA-directed RNA polymerase subunit alpha [Cronobacter universalis]	73.9	134	0.78	2e-13	0.7308	WP_007702470.1
Select seq ref|WP_128312258.1|	DNA-directed RNA polymerase subunit alpha [Enterobacter cloacae]	73.9	134	0.78	2e-13	0.7308	WP_128312258.1
Select seq ref|WP_002209013.1|	MULTISPECIES: DNA-directed RNA polymerase subunit alpha [Enterobacterales]	73.9	134	0.78	2e-13	0.7308	WP_002209013.1
Select seq ref|WP_058914310.1|	DNA-directed RNA polymerase subunit alpha [[Erwinia] teleogrylli]	73.9	134	0.78	2e-13	0.7308	WP_058914310.1
Select seq ref|WP_034461761.1|	MULTISPECIES: DNA-directed RNA polymerase subunit alpha [Enterobacterales]	73.9	134	0.78	2e-13	0.7308	WP_034461761.1
Select seq ref|WP_017374138.1|	DNA-directed RNA polymerase subunit alpha [Enterobacteriaceae bacterium LSJC7]	73.9	134	0.78	2e-13	0.7308	WP_017374138.1
Select seq ref|WP_038240465.1|	MULTISPECIES: DNA-directed RNA polymerase subunit alpha [Xenorhabdus]	73.9	134	0.78	2e-13	0.7308	WP_038240465.1
Select seq ref|WP_101244854.1|	DNA-directed RNA polymerase subunit alpha [Enterobacterales bacterium CwR94]	73.9	134	0.78	2e-13	0.7308	WP_101244854.1
Select seq ref|WP_110244698.1|	DNA-directed RNA polymerase subunit alpha [Klebsiella variicola]	73.9	134	0.78	2e-13	0.7308	WP_110244698.1
Select seq ref|WP_064181625.1|	DNA-directed RNA polymerase subunit alpha [Klebsiella pneumoniae]	73.9	134	0.78	2e-13	0.7308	WP_064181625.1
Select seq ref|WP_092880032.1|	DNA-directed RNA polymerase subunit alpha [Izhakiella capsodis]	73.9	134	0.78	2e-13	0.7308	WP_092880032.1
Select seq ref|WP_101998584.1|	DNA-directed RNA polymerase subunit alpha [Klebsiella pneumoniae]	73.9	134	0.78	2e-13	0.7308	WP_101998584.1
Select seq ref|WP_112465206.1|	DNA-directed RNA polymerase subunit alpha [Yersinia pestis]	73.9	132	0.78	2e-13	0.7308	WP_112465206.1
Select seq ref|WP_063938443.1|	DNA-directed RNA polymerase subunit alpha [Enterobacter cloacae]	73.9	134	0.78	2e-13	0.7308	WP_063938443.1
Select seq ref|WP_055317432.1|	MULTISPECIES: DNA-directed RNA polymerase subunit alpha [Serratia]	73.9	134	0.78	2e-13	0.7308	WP_055317432.1
Select seq ref|WP_074012278.1|	MULTISPECIES: DNA-directed RNA polymerase subunit alpha [Enterobacterales]	73.9	134	0.78	2e-13	0.7308	WP_074012278.1
Select seq ref|WP_022649587.1|	DNA-directed RNA polymerase subunit alpha [Enterobacter hormaechei]	73.9	134	0.78	2e-13	0.7308	WP_022649587.1
Select seq ref|WP_025376656.1|	MULTISPECIES: DNA-directed RNA polymerase subunit alpha [Yersinia]	73.9	134	0.78	2e-13	0.7308	WP_025376656.1
Select seq ref|WP_004709232.1|	MULTISPECIES: DNA-directed RNA polymerase subunit alpha [Yersinia]	73.9	134	0.78	2e-13	0.7308	WP_004709232.1
Select seq ref|WP_048280922.1|	DNA-directed RNA polymerase subunit alpha [Pluralibacter gergoviae]	73.9	134	0.78	2e-13	0.7308	WP_048280922.1
Select seq ref|WP_045960134.1|	DNA-directed RNA polymerase subunit alpha [Xenorhabdus poinarii]	73.9	134	0.78	2e-13	0.7308	WP_045960134.1
Select seq ref|WP_004238609.1|	MULTISPECIES: DNA-directed RNA polymerase subunit alpha [Morganella]	73.9	134	0.78	2e-13	0.7308	WP_004238609.1
Select seq ref|WP_121909172.1|	DNA-directed RNA polymerase subunit alpha [Enterobacter hormaechei]	73.9	134	0.78	2e-13	0.7308	WP_121909172.1
Select seq ref|WP_034899656.1|	MULTISPECIES: DNA-directed RNA polymerase subunit alpha [Enterobacterales]	73.9	134	0.78	2e-13	0.7308	WP_034899656.1
Select seq ref|WP_034940900.1|	DNA-directed RNA polymerase subunit alpha [Erwinia mallotivora]	73.9	134	0.78	2e-13	0.7308	WP_034940900.1
Select seq ref|WP_032466802.1|	DNA-directed RNA polymerase subunit alpha [Yersinia pseudotuberculosis]	73.9	134	0.78	2e-13	0.7308	WP_032466802.1
Select seq ref|WP_036112784.1|	MULTISPECIES: DNA-directed RNA polymerase subunit alpha [Mangrovibacter]	73.9	133	0.78	2e-13	0.7308	WP_036112784.1
Select seq ref|WP_034917462.1|	MULTISPECIES: DNA-directed RNA polymerase subunit alpha [Erwinia]	73.9	134	0.78	2e-13	0.7308	WP_034917462.1
Select seq ref|WP_115027012.1|	DNA-directed RNA polymerase subunit alpha [Yersinia pseudotuberculosis]	73.9	133	0.78	2e-13	0.7308	WP_115027012.1
Select seq ref|WP_134896827.1|	DNA-directed RNA polymerase subunit alpha [Klebsiella pneumoniae]	73.9	134	0.78	2e-13	0.7308	WP_134896827.1

## Sheet: P36659
Table S4. Best matched identites of the individual proteins bound to the biosensor. Green highlight denotes match against E. coli. Yellow highlight denotes match against non-E. coli strains included for testing in this study
Select for downloading or viewing reports	Description	Max Score	Total Score	Query Cover	E value	Per. Ident	Accession
Select seq ref|WP_080110187.1|	DnaJ domain-containing protein [Salmonella enterica]	66.2	66.2	0.78	2e-13	0.9688	WP_080110187.1
Select seq ref|WP_116972417.1|	curved DNA-binding protein [Escherichia coli]	67.4	67.4	0.78	1e-12	0.9688	WP_116972417.1
Select seq ref|WP_000420600.1|	curved DNA-binding protein [Salmonella enterica]	67	67	0.78	2e-12	0.9688	WP_000420600.1
Select seq ref|WP_045721749.1|	curved DNA-binding protein [Salmonella enterica]	67	67	0.78	2e-12	0.9688	WP_045721749.1
Select seq ref|WP_069201028.1|	curved DNA-binding protein [Escherichia coli]	67	67	0.78	2e-12	0.9688	WP_069201028.1
Select seq ref|WP_080221626.1|	curved DNA-binding protein [Salmonella enterica]	67	67	0.78	2e-12	0.9688	WP_080221626.1
Select seq ref|WP_087598894.1|	curved DNA-binding protein [Escherichia coli]	67	67	0.78	2e-12	0.9688	WP_087598894.1
Select seq ref|WP_080197095.1|	curved DNA-binding protein [Salmonella enterica]	66.6	66.6	0.78	2e-12	0.9688	WP_080197095.1
Select seq ref|WP_059320491.1|	curved DNA-binding protein [Escherichia coli]	67.4	67.4	0.78	3e-12	0.9688	WP_059320491.1
Select seq ref|WP_136747015.1|	curved DNA-binding protein [Escherichia coli]	67	67	0.78	3e-12	0.9688	WP_136747015.1
Select seq ref|WP_063268748.1|	curved DNA-binding protein [Escherichia coli]	67.4	67.4	0.78	3e-12	0.9688	WP_063268748.1
Select seq ref|WP_063268483.1|	curved DNA-binding protein [Escherichia coli]	67.4	67.4	0.78	3e-12	0.9688	WP_063268483.1
Select seq ref|WP_130091296.1|	curved DNA-binding protein [Escherichia coli]	67	67	0.78	3e-12	0.9688	WP_130091296.1
Select seq ref|WP_052973978.1|	curved DNA-binding protein [Shigella sonnei]	67	67	0.78	3e-12	0.9688	WP_052973978.1
Select seq ref|WP_032238705.1|	curved DNA-binding protein [Escherichia coli]	67	67	0.78	3e-12	0.9688	WP_032238705.1
Select seq ref|WP_042097708.1|	curved DNA-binding protein [Escherichia coli]	67	67	0.78	3e-12	0.9688	WP_042097708.1
Select seq ref|WP_119172953.1|	curved DNA-binding protein [Shigella flexneri]	67.4	67.4	0.78	3e-12	0.9688	WP_119172953.1
Select seq ref|WP_119179479.1|	curved DNA-binding protein [Shigella sonnei]	67.4	67.4	0.78	3e-12	0.9688	WP_119179479.1
Select seq ref|WP_105955858.1|	curved DNA-binding protein [Escherichia coli]	67.4	67.4	0.78	3e-12	0.9688	WP_105955858.1
Select seq ref|WP_060454899.1|	curved DNA-binding protein [Salmonella enterica]	66.6	66.6	0.78	3e-12	0.9688	WP_060454899.1
Select seq ref|WP_061695974.1|	curved DNA-binding protein [Salmonella enterica]	66.6	66.6	0.78	4e-12	0.9688	WP_061695974.1
Select seq ref|WP_079850955.1|	curved DNA-binding protein [Salmonella enterica]	67	67	0.78	4e-12	0.9688	WP_079850955.1
Select seq ref|WP_139736253.1|	DnaJ domain-containing protein [Escherichia coli]	67	67	0.78	5e-12	0.9688	WP_139736253.1
Select seq ref|WP_001421958.1|	curved DNA-binding protein [Escherichia coli]	67	67	0.78	5e-12	0.9688	WP_001421958.1
Select seq ref|WP_135119760.1|	curved DNA-binding protein [Escherichia coli]	67	67	0.78	5e-12	0.9688	WP_135119760.1
Select seq ref|WP_000963062.1|	curved DNA-binding protein [Escherichia coli]	67	67	0.78	5e-12	0.9688	WP_000963062.1
Select seq ref|WP_137350481.1|	curved DNA-binding protein [Citrobacter sp. wls708]	67	67	0.78	5e-12	0.9688	WP_137350481.1
Select seq ref|WP_126722257.1|	curved DNA-binding protein [Escherichia coli]	67	67	0.78	5e-12	0.9688	WP_126722257.1
Select seq ref|WP_105287143.1|	curved DNA-binding protein [Escherichia sp. MOD1-EC5433]	67	67	0.78	5e-12	0.9688	WP_105287143.1
Select seq ref|WP_128480547.1|	curved DNA-binding protein [Escherichia coli]	67	67	0.78	5e-12	0.9688	WP_128480547.1
Select seq ref|WP_103488092.1|	DnaJ domain-containing protein [Escherichia coli]	67	67	0.78	5e-12	0.9688	WP_103488092.1
Select seq ref|WP_001441234.1|	curved DNA-binding protein [Escherichia coli]	67	67	0.78	5e-12	0.9688	WP_001441234.1
Select seq ref|WP_103556877.1|	curved DNA-binding protein [Escherichia coli]	67	67	0.78	5e-12	0.9688	WP_103556877.1
Select seq ref|WP_139500300.1|	curved DNA-binding protein [Escherichia coli]	67	67	0.78	5e-12	0.9688	WP_139500300.1
Select seq ref|WP_107179578.1|	curved DNA-binding protein [Escherichia sp. 20412-1]	67	67	0.78	5e-12	0.9688	WP_107179578.1
Select seq ref|WP_115602275.1|	curved DNA-binding protein [Citrobacter freundii]	67	67	0.78	5e-12	0.9688	WP_115602275.1
Select seq ref|WP_096944021.1|	curved DNA-binding protein [Escherichia coli]	67	67	0.78	5e-12	0.9688	WP_096944021.1
Select seq ref|WP_116360270.1|	MULTISPECIES: curved DNA-binding protein [Enterobacteriaceae]	67	67	0.78	5e-12	0.9688	WP_116360270.1
Select seq ref|WP_105453417.1|	curved DNA-binding protein [Escherichia coli]	67	67	0.78	5e-12	0.9688	WP_105453417.1
Select seq ref|WP_074481151.1|	curved DNA-binding protein [Escherichia coli]	67	67	0.78	5e-12	0.9688	WP_074481151.1
Select seq ref|WP_100034930.1|	curved DNA-binding protein [Escherichia coli]	67	67	0.78	5e-12	0.9688	WP_100034930.1
Select seq ref|WP_103540162.1|	curved DNA-binding protein [Escherichia coli]	67	67	0.78	5e-12	0.9688	WP_103540162.1
Select seq ref|WP_052893526.1|	curved DNA-binding protein [Escherichia coli]	67	67	0.78	5e-12	0.9688	WP_052893526.1
Select seq ref|WP_061440270.1|	curved DNA-binding protein [Shigella flexneri]	67	67	0.78	5e-12	0.9688	WP_061440270.1
Select seq ref|WP_043001059.1|	curved DNA-binding protein [Citrobacter sp. MGH 55]	67	67	0.78	5e-12	0.9688	WP_043001059.1
Select seq ref|WP_137578480.1|	curved DNA-binding protein [Escherichia coli]	67	67	0.78	5e-12	0.9688	WP_137578480.1
Select seq ref|WP_112020415.1|	curved DNA-binding protein [Escherichia coli]	67	67	0.78	5e-12	0.9688	WP_112020415.1
Select seq ref|WP_073544297.1|	curved DNA-binding protein [Escherichia coli]	67	67	0.78	5e-12	0.9688	WP_073544297.1
Select seq ref|WP_053884889.1|	curved DNA-binding protein [Escherichia coli]	67	67	0.78	5e-12	0.9688	WP_053884889.1
Select seq ref|WP_085445010.1|	curved DNA-binding protein [Escherichia coli]	67	67	0.78	5e-12	0.9688	WP_085445010.1
Select seq ref|WP_088131137.1|	curved DNA-binding protein [Escherichia coli]	67	67	0.78	5e-12	0.9688	WP_088131137.1
Select seq ref|WP_103847372.1|	curved DNA-binding protein [Escherichia coli]	67	67	0.78	5e-12	0.9688	WP_103847372.1
Select seq ref|WP_044327078.1|	MULTISPECIES: curved DNA-binding protein [Gammaproteobacteria]	67	67	0.78	5e-12	0.9688	WP_044327078.1
Select seq ref|WP_089615254.1|	curved DNA-binding protein [Escherichia coli]	67	67	0.78	5e-12	0.9688	WP_089615254.1
Select seq ref|WP_105284911.1|	curved DNA-binding protein [Escherichia sp. MOD1-EC5495]	67	67	0.78	5e-12	0.9688	WP_105284911.1
Select seq ref|WP_112935656.1|	curved DNA-binding protein [Escherichia coli]	67	67	0.78	5e-12	0.9688	WP_112935656.1
Select seq ref|WP_136139363.1|	curved DNA-binding protein [Escherichia coli]	67	67	0.78	5e-12	0.9688	WP_136139363.1
Select seq ref|WP_137484574.1|	curved DNA-binding protein [Escherichia coli]	67	67	0.78	5e-12	0.9688	WP_137484574.1
Select seq ref|WP_128880771.1|	curved DNA-binding protein [Shigella dysenteriae]	67	67	0.78	5e-12	0.9688	WP_128880771.1
Select seq ref|WP_074558259.1|	curved DNA-binding protein [Escherichia coli]	67	67	0.78	5e-12	0.9688	WP_074558259.1
Select seq ref|WP_103565997.1|	curved DNA-binding protein [Escherichia coli]	67	67	0.78	5e-12	0.9688	WP_103565997.1
Select seq ref|WP_073461934.1|	curved DNA-binding protein [Escherichia coli]	67	67	0.78	5e-12	0.9688	WP_073461934.1
Select seq ref|WP_069720819.1|	curved DNA-binding protein [Escherichia coli]	67	67	0.78	5e-12	0.9688	WP_069720819.1
Select seq ref|WP_089571421.1|	curved DNA-binding protein [Escherichia coli]	67	67	0.78	5e-12	0.9688	WP_089571421.1
Select seq ref|WP_065222389.1|	curved DNA-binding protein [Escherichia coli]	67	67	0.78	5e-12	0.9688	WP_065222389.1
Select seq ref|WP_137529588.1|	curved DNA-binding protein [Escherichia coli]	67	67	0.78	5e-12	0.9688	WP_137529588.1
Select seq ref|WP_098704096.1|	curved DNA-binding protein [Escherichia coli]	67	67	0.78	5e-12	0.9688	WP_098704096.1
Select seq ref|WP_042005287.1|	curved DNA-binding protein [Escherichia coli]	67	67	0.78	5e-12	0.9688	WP_042005287.1
Select seq ref|WP_077526601.1|	curved DNA-binding protein [Escherichia coli]	67	67	0.78	5e-12	0.9688	WP_077526601.1
Select seq ref|WP_113367767.1|	curved DNA-binding protein [Escherichia coli]	67	67	0.78	5e-12	0.9688	WP_113367767.1
Select seq ref|WP_125093863.1|	curved DNA-binding protein [Escherichia coli]	67	67	0.78	5e-12	0.9688	WP_125093863.1
Select seq ref|WP_096325006.1|	curved DNA-binding protein [Escherichia coli]	67	67	0.78	5e-12	0.9688	WP_096325006.1
Select seq ref|WP_048212099.1|	MULTISPECIES: curved DNA-binding protein [Citrobacter]	67	67	0.78	5e-12	0.9688	WP_048212099.1
Select seq ref|WP_136476286.1|	curved DNA-binding protein [Escherichia coli]	67	67	0.78	5e-12	0.9688	WP_136476286.1
Select seq ref|WP_054192323.1|	curved DNA-binding protein [Escherichia coli]	67	67	0.78	5e-12	0.9688	WP_054192323.1
Select seq ref|WP_124038696.1|	curved DNA-binding protein [Escherichia coli]	67	67	0.78	5e-12	0.9688	WP_124038696.1
Select seq ref|WP_096093234.1|	curved DNA-binding protein [Escherichia coli]	67	67	0.78	5e-12	0.9688	WP_096093234.1
Select seq ref|WP_068866472.1|	curved DNA-binding protein [Escherichia coli]	67	67	0.78	5e-12	0.9688	WP_068866472.1
Select seq ref|WP_060564971.1|	curved DNA-binding protein [Escherichia coli]	67	67	0.78	5e-12	0.9688	WP_060564971.1
Select seq ref|WP_064108525.1|	curved DNA-binding protein [Escherichia coli]	67	67	0.78	5e-12	0.9688	WP_064108525.1
Select seq ref|WP_097339549.1|	curved DNA-binding protein [Escherichia coli]	67	67	0.78	5e-12	0.9688	WP_097339549.1
Select seq ref|WP_045177120.1|	curved DNA-binding protein [Escherichia coli]	67	67	0.78	5e-12	0.9688	WP_045177120.1
Select seq ref|WP_054495702.1|	curved DNA-binding protein [Escherichia coli]	67	67	0.78	5e-12	0.9688	WP_054495702.1
Select seq ref|WP_039061114.1|	curved DNA-binding protein [Shigella flexneri]	67	67	0.78	5e-12	0.9688	WP_039061114.1
Select seq ref|WP_115439224.1|	curved DNA-binding protein [Escherichia coli]	67	67	0.78	5e-12	0.9688	WP_115439224.1
Select seq ref|WP_097609180.1|	curved DNA-binding protein [Escherichia coli]	67	67	0.78	5e-12	0.9688	WP_097609180.1
Select seq ref|WP_112041806.1|	curved DNA-binding protein [Escherichia coli]	67	67	0.78	5e-12	0.9688	WP_112041806.1
Select seq ref|WP_109740157.1|	MULTISPECIES: curved DNA-binding protein [Citrobacter]	67	67	0.78	5e-12	0.9688	WP_109740157.1
Select seq ref|WP_113864460.1|	curved DNA-binding protein [Escherichia coli]	67	67	0.78	5e-12	0.9688	WP_113864460.1
Select seq ref|WP_112043740.1|	curved DNA-binding protein [Escherichia coli]	67	67	0.78	5e-12	0.9688	WP_112043740.1
Select seq ref|WP_116276792.1|	DnaJ domain-containing protein [Klebsiella pneumoniae]	64.3	64.3	0.75	9e-13	0.9677	WP_116276792.1
Select seq ref|WP_079838031.1|	curved DNA-binding protein [Salmonella enterica]	66.2	66.2	0.78	5e-12	0.9375	WP_079838031.1

## Sheet: P75937
Table S4. Best matched identites of the individual proteins bound to the biosensor. Green highlight denotes match against E. coli. Yellow highlight denotes match against non-E. coli strains included for testing in this study
Select for downloading or viewing reports	Description	Max Score	Total Score	Query Cover	E value	Per. Ident	Accession
Select seq ref|WP_129303877.1|	flagellar hook-basal body complex protein [Klebsiella pneumoniae]	64.7	103	0.55	9e-12	1	WP_129303877.1
Select seq ref|WP_119183533.1|	flagellar hook-basal body complex protein [Shigella dysenteriae]	64.7	106	0.56	1e-11	1	WP_119183533.1
Select seq ref|WP_045714512.1|	flagellar hook-basal body complex protein [Salmonella enterica]	63.2	104	0.56	3e-11	0.9688	WP_045714512.1
Select seq ref|WP_031619817.1|	flagellar hook-basal body complex protein [Salmonella enterica]	63.2	104	0.56	3e-11	0.9688	WP_031619817.1
Select seq ref|WP_116967588.1|	flagellar hook-basal body complex protein [Escherichia coli]	64.3	105	0.56	4e-11	1	WP_116967588.1
Select seq ref|WP_122990116.1|	flagellar hook-basal body complex protein [Escherichia coli]	64.3	105	0.56	4e-11	1	WP_122990116.1
Select seq ref|WP_096071097.1|	flagellar hook-basal body complex protein [Escherichia coli]	64.3	105	0.56	4e-11	1	WP_096071097.1
Select seq ref|WP_074454912.1|	flagellar hook-basal body complex protein [Escherichia coli]	64.3	105	0.56	5e-11	1	WP_074454912.1
Select seq ref|WP_139778374.1|	flagellar hook-basal body complex protein [Salmonella enterica]	62.8	103	0.56	8e-11	0.9688	WP_139778374.1
Select seq ref|WP_001725365.1|	flagellar hook-basal body complex protein [Salmonella enterica]	63.2	104	0.56	1e-10	0.9688	WP_001725365.1
Select seq ref|WP_115969904.1|	flagellar hook-basal body complex protein [Escherichia coli]	64.7	106	0.56	1e-10	1	WP_115969904.1
Select seq ref|WP_114110936.1|	flagellar hook-basal body complex protein [Escherichia coli]	65.1	106	0.56	1e-10	1	WP_114110936.1
Select seq ref|WP_079847688.1|	flagellar hook-basal body complex protein [Salmonella enterica]	64.3	105	0.56	1e-10	0.9688	WP_079847688.1
Select seq ref|WP_080105019.1|	flagellar hook-basal body complex protein [Salmonella enterica]	63.5	104	0.56	1e-10	0.9688	WP_080105019.1
Select seq ref|WP_140437776.1|	flagellar hook-basal body complex protein [Salmonella enterica]	63.9	105	0.56	1e-10	0.9688	WP_140437776.1
Select seq ref|WP_031620347.1|	flagellar hook-basal body complex protein [Salmonella enterica]	63.9	105	0.56	1e-10	0.9688	WP_031620347.1
Select seq ref|WP_080236843.1|	flagellar hook-basal body complex protein [Salmonella enterica]	63.5	105	0.56	1e-10	0.9688	WP_080236843.1
Select seq ref|WP_132970170.1|	flagellar hook-basal body complex protein [Salmonella enterica]	64.3	106	0.56	1e-10	0.9688	WP_132970170.1
Select seq ref|WP_069484508.1|	flagellar hook-basal body complex protein [Escherichia coli]	65.1	106	0.56	2e-10	1	WP_069484508.1
Select seq ref|WP_139817141.1|	flagellar hook-basal body complex protein [Salmonella enterica]	64.3	105	0.56	2e-10	0.9688	WP_139817141.1
Select seq ref|WP_000020477.1|	flagellar hook assembly protein FlgD [Shigella flexneri]	65.5	155	1	3e-10	0.9412	WP_000020477.1
Select seq ref|WP_001300136.1|	flagellar hook protein FlgE [Escherichia coli]	65.5	107	0.56	3e-10	1	WP_001300136.1
Select seq ref|WP_069201319.1|	flagellar hook protein FlgE [Escherichia coli]	65.1	107	0.56	3e-10	1	WP_069201319.1
Select seq ref|WP_126715554.1|	flagellar hook protein FlgE [Escherichia coli]	65.1	159	1	3e-10	1	WP_126715554.1
Select seq ref|WP_135409830.1|	flagellar hook protein FlgE [Escherichia sp. E4385]	65.1	159	1	3e-10	1	WP_135409830.1
Select seq ref|WP_052869930.1|	flagellar hook protein FlgE [Escherichia coli]	64.7	106	0.54	3e-10	1	WP_052869930.1
Select seq ref|WP_052988793.1|	flagellar hook protein FlgE [Shigella sonnei]	65.1	106	0.56	3e-10	1	WP_052988793.1
Select seq ref|WP_001598394.1|	flagellar hook protein FlgE [Escherichia coli]	65.1	159	1	3e-10	1	WP_001598394.1
Select seq ref|WP_053919680.1|	flagellar hook protein FlgE [Escherichia coli]	65.1	159	1	3e-10	1	WP_053919680.1
Select seq ref|WP_053903605.1|	flagellar hook protein FlgE [Escherichia coli]	65.1	159	1	3e-10	1	WP_053903605.1
Select seq ref|WP_135491145.1|	flagellar hook protein FlgE [Escherichia sp. E4694]	65.1	159	1	3e-10	1	WP_135491145.1
Select seq ref|WP_029487525.1|	flagellar hook protein FlgE [Escherichia coli]	65.1	159	1	3e-10	1	WP_029487525.1
Select seq ref|WP_136721176.1|	flagellar hook-basal body complex protein [Escherichia coli]	65.1	155	1	3e-10	1	WP_136721176.1
Select seq ref|WP_096966950.1|	flagellar hook protein FlgE [Escherichia coli]	65.1	159	1	3e-10	1	WP_096966950.1
Select seq ref|WP_129019172.1|	flagellar hook protein FlgE [Escherichia coli]	65.1	159	1	3e-10	1	WP_129019172.1
Select seq ref|WP_112025364.1|	flagellar hook protein FlgE [Escherichia coli]	65.1	159	1	3e-10	1	WP_112025364.1
Select seq ref|WP_096982421.1|	flagellar hook protein FlgE [Escherichia coli]	65.1	159	1	3e-10	1	WP_096982421.1
Select seq ref|WP_089563693.1|	flagellar hook protein FlgE [Escherichia coli]	65.1	159	1	3e-10	1	WP_089563693.1
Select seq ref|WP_052985122.1|	flagellar hook protein FlgE [Shigella sonnei]	65.1	106	0.56	4e-10	1	WP_052985122.1
Select seq ref|WP_089570165.1|	flagellar hook protein FlgE [Escherichia coli]	65.1	157	1	4e-10	1	WP_089570165.1
Select seq ref|WP_089551824.1|	flagellar hook protein FlgE [Escherichia coli]	65.1	159	1	4e-10	1	WP_089551824.1
Select seq ref|WP_069915844.1|	flagellar hook protein FlgE [Escherichia coli]	65.1	159	1	4e-10	1	WP_069915844.1
Select seq ref|WP_112030732.1|	flagellar hook protein FlgE [Escherichia coli]	65.1	159	1	4e-10	1	WP_112030732.1
Select seq ref|WP_074459438.1|	flagellar hook protein FlgE [Escherichia coli]	65.1	159	1	4e-10	1	WP_074459438.1
Select seq ref|WP_052988349.1|	flagellar hook protein FlgE [Shigella sonnei]	65.1	106	0.56	4e-10	1	WP_052988349.1
Select seq ref|WP_052974233.1|	flagellar hook protein FlgE [Shigella sonnei]	65.1	159	1	4e-10	1	WP_052974233.1
Select seq ref|WP_124062196.1|	flagellar hook protein FlgE [Escherichia coli]	65.1	106	0.56	4e-10	1	WP_124062196.1
Select seq ref|WP_032206065.1|	flagellar hook protein FlgE [Escherichia coli]	65.1	159	1	4e-10	1	WP_032206065.1
Select seq ref|WP_097418209.1|	flagellar hook protein FlgE [Escherichia coli]	65.1	159	1	4e-10	1	WP_097418209.1
Select seq ref|WP_096889285.1|	flagellar hook protein FlgE [Escherichia coli]	65.1	159	1	4e-10	1	WP_096889285.1
Select seq ref|WP_106493995.1|	flagellar hook protein FlgE [Escherichia coli]	65.1	159	1	4e-10	1	WP_106493995.1
Select seq ref|WP_130562964.1|	flagellar hook protein FlgE [Escherichia coli]	65.1	159	1	4e-10	1	WP_130562964.1
Select seq ref|WP_024220523.1|	flagellar hook protein FlgE [Escherichia coli]	65.1	157	1	4e-10	1	WP_024220523.1
Select seq ref|WP_126495085.1|	flagellar hook protein FlgE [Escherichia coli]	65.1	159	1	4e-10	1	WP_126495085.1
Select seq ref|WP_105462206.1|	flagellar hook protein FlgE [Escherichia coli]	65.1	159	1	4e-10	1	WP_105462206.1
Select seq ref|WP_001711700.1|	flagellar hook protein FlgE [Escherichia coli]	65.1	159	1	4e-10	1	WP_001711700.1
Select seq ref|WP_001598427.1|	flagellar hook protein FlgE [Escherichia coli]	65.1	159	1	4e-10	1	WP_001598427.1
Select seq ref|WP_052962220.1|	flagellar hook protein FlgE [Shigella sonnei]	65.1	157	1	4e-10	1	WP_052962220.1
Select seq ref|WP_001712691.1|	flagellar hook protein FlgE [Escherichia coli]	65.1	159	1	4e-10	1	WP_001712691.1
Select seq ref|WP_047457535.1|	flagellar hook protein FlgE [Citrobacter koseri]	65.1	159	1	4e-10	1	WP_047457535.1
Select seq ref|WP_001620642.1|	flagellar hook protein FlgE [Escherichia coli]	65.1	159	1	4e-10	1	WP_001620642.1
Select seq ref|WP_097726166.1|	flagellar hook protein FlgE [Escherichia coli]	65.1	159	1	4e-10	1	WP_097726166.1
Select seq ref|WP_113986992.1|	flagellar hook protein FlgE [Escherichia coli]	65.1	159	1	4e-10	1	WP_113986992.1
Select seq ref|WP_001678513.1|	flagellar hook protein FlgE [Escherichia coli]	65.1	159	1	4e-10	1	WP_001678513.1
Select seq ref|WP_074579458.1|	flagellar hook protein FlgE [Escherichia coli]	65.1	159	1	4e-10	1	WP_074579458.1
Select seq ref|WP_115200126.1|	flagellar hook protein FlgE [Escherichia coli]	65.1	156	1	4e-10	1	WP_115200126.1
Select seq ref|WP_003910755.1|	flagellar hook protein FlgE [Escherichia coli]	65.1	159	1	4e-10	1	WP_003910755.1
Select seq ref|WP_096967990.1|	flagellar hook protein FlgE [Escherichia coli]	65.1	159	1	4e-10	1	WP_096967990.1
Select seq ref|WP_078279977.1|	flagellar hook protein FlgE [Escherichia coli]	65.1	159	1	4e-10	1	WP_078279977.1
Select seq ref|WP_106708566.1|	flagellar hook protein FlgE [Escherichia coli]	65.1	159	1	4e-10	1	WP_106708566.1
Select seq ref|WP_116837651.1|	flagellar hook protein FlgE [Escherichia coli]	65.1	159	1	4e-10	1	WP_116837651.1
Select seq ref|WP_086726819.1|	flagellar hook protein FlgE [Escherichia coli]	65.1	159	1	4e-10	1	WP_086726819.1
Select seq ref|WP_096981856.1|	flagellar hook protein FlgE [Escherichia coli]	65.1	159	1	4e-10	1	WP_096981856.1
Select seq ref|WP_134737744.1|	flagellar hook protein FlgE [Escherichia coli]	65.1	158	1	4e-10	1	WP_134737744.1
Select seq ref|WP_023485868.1|	flagellar hook protein FlgE [Escherichia coli]	65.1	159	1	4e-10	1	WP_023485868.1
Select seq ref|WP_063123221.1|	flagellar hook protein FlgE [Escherichia coli]	65.1	159	1	4e-10	1	WP_063123221.1
Select seq ref|WP_042100941.1|	flagellar hook protein FlgE [Escherichia coli]	65.1	159	1	4e-10	1	WP_042100941.1
Select seq ref|WP_137557476.1|	flagellar hook protein FlgE [Escherichia coli]	65.1	159	1	4e-10	1	WP_137557476.1
Select seq ref|WP_137541598.1|	flagellar hook protein FlgE [Escherichia coli]	65.1	159	1	4e-10	1	WP_137541598.1
Select seq ref|WP_064528547.1|	MULTISPECIES: flagellar hook protein FlgE [Escherichia]	65.1	159	1	4e-10	1	WP_064528547.1
Select seq ref|WP_135522831.1|	flagellar hook protein FlgE [Escherichia sp. E4742]	65.1	159	1	4e-10	1	WP_135522831.1
Select seq ref|WP_096778030.1|	flagellar hook protein FlgE [Escherichia coli]	65.1	159	1	4e-10	1	WP_096778030.1
Select seq ref|WP_044809280.1|	flagellar hook protein FlgE [Escherichia coli]	65.1	159	1	4e-10	1	WP_044809280.1
Select seq ref|WP_112902340.1|	flagellar hook protein FlgE [Escherichia coli]	65.1	159	1	4e-10	1	WP_112902340.1
Select seq ref|WP_029490205.1|	flagellar hook protein FlgE [Escherichia coli]	65.1	117	1	4e-10	1	WP_029490205.1
Select seq ref|WP_115185643.1|	flagellar hook protein FlgE [Escherichia coli]	65.1	159	1	4e-10	1	WP_115185643.1
Select seq ref|WP_004015481.1|	flagellar hook protein FlgE [Escherichia coli]	65.1	156	1	4e-10	1	WP_004015481.1
Select seq ref|WP_096891594.1|	flagellar hook protein FlgE [Escherichia coli]	65.1	159	1	4e-10	1	WP_096891594.1
Select seq ref|WP_130215880.1|	MULTISPECIES: flagellar hook protein FlgE [Escherichia]	65.1	159	1	4e-10	1	WP_130215880.1
Select seq ref|WP_128300261.1|	flagellar hook protein FlgE [Escherichia coli]	65.1	159	1	4e-10	1	WP_128300261.1
Select seq ref|WP_130236160.1|	MULTISPECIES: flagellar hook protein FlgE [Escherichia]	65.1	159	1	4e-10	1	WP_130236160.1
Select seq ref|WP_124326458.1|	flagellar hook protein FlgE [Escherichia coli]	65.1	159	1	4e-10	1	WP_124326458.1
Select seq ref|WP_130222893.1|	flagellar hook protein FlgE [Escherichia sp. E13S3]	65.1	159	1	4e-10	1	WP_130222893.1
Select seq ref|WP_130058931.1|	flagellar hook protein FlgE [Escherichia coli]	65.1	159	1	4e-10	1	WP_130058931.1
Select seq ref|WP_096837740.1|	flagellar hook protein FlgE [Escherichia coli]	65.1	159	1	4e-10	1	WP_096837740.1
Select seq ref|WP_136758555.1|	flagellar hook-basal body complex protein [Escherichia coli]	65.1	159	1	4e-10	1	WP_136758555.1
Select seq ref|WP_078164868.1|	flagellar hook protein FlgE [Escherichia coli]	65.1	159	1	4e-10	1	WP_078164868.1
Select seq ref|WP_122655562.1|	flagellar hook protein FlgE [Escherichia coli]	65.1	159	1	4e-10	1	WP_122655562.1
Select seq ref|WP_102818540.1|	flagellar hook protein FlgE [Escherichia coli]	65.1	106	0.56	4e-10	1	WP_102818540.1
Select seq ref|WP_096839759.1|	flagellar hook protein FlgE [Escherichia coli]	65.1	159	1	4e-10	1	WP_096839759.1

## Sheet: P33235
Table S4. Best matched identites of the individual proteins bound to the biosensor. Green highlight denotes match against E. coli. Yellow highlight denotes match against non-E. coli strains included for testing in this study
Select for downloading or viewing reports	Description	Max Score	Total Score	Query Cover	E value	Per. Ident	Accession
Select seq ref|WP_072145672.1|	flagella basal body rod family protein [Escherichia coli]	67	67	0.32	4e-12	1	WP_072145672.1
Select seq ref|WP_000096444.1|	flagellar hook-associated protein FlgK [Escherichia coli]	67.8	124	1	2e-11	1	WP_000096444.1
Select seq ref|WP_074511123.1|	flagellar hook-associated protein FlgK [Escherichia coli]	67.8	124	1	2e-11	1	WP_074511123.1
Select seq ref|WP_064766785.1|	flagellar hook-associated protein FlgK [Escherichia coli]	67.8	124	1	3e-11	1	WP_064766785.1
Select seq ref|WP_119090310.1|	flagellar hook-associated protein FlgK [Escherichia coli]	67.4	123	1	3e-11	1	WP_119090310.1
Select seq ref|WP_064766634.1|	flagellar hook-associated protein FlgK [Escherichia coli]	67.4	123	1	3e-11	1	WP_064766634.1
Select seq ref|WP_020245251.1|	flagellar hook-associated protein FlgK [Escherichia coli]	67.8	124	1	3e-11	1	WP_020245251.1
Select seq ref|WP_020245499.1|	flagellar hook-associated protein FlgK [Escherichia coli]	67.8	124	1	3e-11	1	WP_020245499.1
Select seq ref|WP_049021899.1|	flagellar hook-associated protein FlgK [Escherichia coli]	67.8	124	1	3e-11	1	WP_049021899.1
Select seq ref|WP_135384675.1|	MULTISPECIES: flagellar hook-associated protein FlgK [Escherichia]	68.6	122	1	4e-11	1	WP_135384675.1
Select seq ref|WP_130215890.1|	MULTISPECIES: flagellar hook-associated protein FlgK [Escherichia]	68.2	121	1	4e-11	1	WP_130215890.1
Select seq ref|WP_137518221.1|	flagellar hook-associated protein FlgK [Escherichia coli]	67.8	124	1	4e-11	1	WP_137518221.1
Select seq ref|WP_135404188.1|	flagellar hook-associated protein FlgK [Escherichia sp. E4930]	68.2	121	1	4e-11	1	WP_135404188.1
Select seq ref|WP_128875238.1|	flagellar hook-filament junction protein FlgL [Shigella dysenteriae]	68.2	68.2	0.32	4e-11	1	WP_128875238.1
Select seq ref|WP_143565594.1|	flagellar hook-associated protein FlgK [Shigella sonnei]	68.2	160	1	4e-11	1	WP_143565594.1
Select seq ref|WP_096324325.1|	flagellar hook-associated protein FlgK [Escherichia coli]	68.2	160	1	5e-11	1	WP_096324325.1
Select seq ref|WP_032314887.1|	flagellar hook-associated protein FlgK [Escherichia coli]	67.8	124	1	5e-11	1	WP_032314887.1
Select seq ref|WP_124809502.1|	flagellar hook-associated protein FlgK [Escherichia coli]	68.2	160	1	5e-11	1	WP_124809502.1
Select seq ref|WP_077789367.1|	flagellar hook-associated protein FlgK [Escherichia coli]	68.2	160	1	5e-11	1	WP_077789367.1
Select seq ref|WP_105289139.1|	flagellar hook-associated protein FlgK [Escherichia sp. MOD1-EC5350]	68.2	122	1	5e-11	1	WP_105289139.1
Select seq ref|WP_038354437.1|	flagellar hook-associated protein FlgK [Escherichia marmotae]	68.2	121	1	5e-11	1	WP_038354437.1
Select seq ref|WP_078180312.1|	flagellar hook-associated protein FlgK [Escherichia coli]	68.2	160	1	5e-11	1	WP_078180312.1
Select seq ref|WP_001622688.1|	flagellar hook-associated protein FlgK [Escherichia coli]	68.2	160	1	5e-11	1	WP_001622688.1
Select seq ref|WP_065407794.1|	flagellar hook-associated protein FlgK [Shigella sonnei]	67.8	123	1	5e-11	1	WP_065407794.1
Select seq ref|WP_046201498.1|	flagellar hook-associated protein FlgK [Escherichia coli]	68.2	159	1	5e-11	1	WP_046201498.1
Select seq ref|WP_130236155.1|	MULTISPECIES: flagellar hook-associated protein FlgK [Escherichia]	68.2	120	1	5e-11	1	WP_130236155.1
Select seq ref|WP_105224288.1|	MULTISPECIES: flagellar hook-associated protein FlgK [Escherichia]	68.2	121	1	5e-11	1	WP_105224288.1
Select seq ref|WP_096249099.1|	flagellar hook-associated protein FlgK [Escherichia coli]	68.2	160	1	5e-11	1	WP_096249099.1
Select seq ref|WP_032206319.1|	flagellar hook-associated protein FlgK [Escherichia coli]	68.2	160	1	5e-11	1	WP_032206319.1
Select seq ref|WP_085448866.1|	flagellar hook-associated protein FlgK [Escherichia marmotae]	68.2	121	1	5e-11	1	WP_085448866.1
Select seq ref|WP_000096457.1|	flagellar hook-associated protein FlgK [Escherichia coli]	67.8	124	1	5e-11	1	WP_000096457.1
Select seq ref|WP_113401679.1|	flagellar hook-associated protein FlgK [Escherichia coli]	68.2	160	1	5e-11	1	WP_113401679.1
Select seq ref|WP_088209618.1|	flagellar hook-associated protein FlgK [Escherichia coli]	68.2	160	1	5e-11	1	WP_088209618.1
Select seq ref|WP_112901425.1|	flagellar hook-associated protein FlgK [Escherichia coli]	68.2	160	1	5e-11	1	WP_112901425.1
Select seq ref|WP_115775109.1|	flagellar hook-associated protein FlgK [Escherichia coli]	68.2	121	1	5e-11	1	WP_115775109.1
Select seq ref|WP_136752530.1|	flagellar hook-associated protein FlgK [Escherichia coli]	68.2	160	1	5e-11	1	WP_136752530.1
Select seq ref|WP_112844121.1|	flagellar hook-associated protein FlgK [Escherichia coli]	68.2	160	1	5e-11	1	WP_112844121.1
Select seq ref|WP_096096063.1|	flagellar hook-associated protein FlgK [Escherichia coli]	68.2	160	1	5e-11	1	WP_096096063.1
Select seq ref|WP_064670247.1|	flagellar hook-associated protein FlgK [Escherichia coli]	68.2	124	1	5e-11	1	WP_064670247.1
Select seq ref|WP_112014709.1|	flagellar hook-associated protein FlgK [Escherichia coli]	68.2	160	1	5e-11	1	WP_112014709.1
Select seq ref|WP_113073870.1|	flagellar hook-associated protein FlgK [Escherichia coli]	68.2	160	1	5e-11	1	WP_113073870.1
Select seq ref|WP_112046621.1|	hypothetical protein [Escherichia coli]	67.8	114	0.85	5e-11	1	WP_112046621.1
Select seq ref|WP_087603489.1|	flagellar hook-associated protein FlgK [Escherichia coli]	67.8	159	1	5e-11	1	WP_087603489.1
Select seq ref|WP_089619341.1|	flagellar hook-associated protein FlgK [Escherichia coli]	68.2	160	1	5e-11	1	WP_089619341.1
Select seq ref|WP_128447297.1|	flagellar hook-associated protein FlgK [Escherichia coli]	68.2	160	1	5e-11	1	WP_128447297.1
Select seq ref|WP_074480856.1|	flagellar hook-associated protein FlgK [Escherichia coli]	68.2	160	1	5e-11	1	WP_074480856.1
Select seq ref|WP_097473502.1|	flagellar hook-associated protein FlgK [Escherichia coli]	68.2	160	1	5e-11	1	WP_097473502.1
Select seq ref|WP_096790929.1|	flagellar hook-associated protein FlgK [Escherichia coli]	68.2	124	1	5e-11	1	WP_096790929.1
Select seq ref|WP_096997341.1|	flagellar hook-associated protein FlgK [Escherichia coli]	68.2	160	1	5e-11	1	WP_096997341.1
Select seq ref|WP_042201267.1|	flagellar hook-associated protein FlgK [Escherichia coli]	68.2	157	1	5e-11	1	WP_042201267.1
Select seq ref|WP_077580661.1|	flagellar hook-associated protein FlgK [Escherichia coli]	68.2	160	1	5e-11	1	WP_077580661.1
Select seq ref|WP_063097156.1|	flagellar hook-associated protein FlgK [Escherichia coli]	68.2	160	1	5e-11	1	WP_063097156.1
Select seq ref|WP_121865715.1|	flagellar hook-associated protein FlgK [Escherichia coli]	68.2	160	1	5e-11	1	WP_121865715.1
Select seq ref|WP_053266025.1|	flagellar hook-associated protein FlgK [Escherichia coli]	68.2	160	1	5e-11	1	WP_053266025.1
Select seq ref|WP_097404106.1|	flagellar hook-associated protein FlgK [Escherichia coli]	68.2	160	1	5e-11	1	WP_097404106.1
Select seq ref|WP_060877246.1|	flagellar hook-associated protein FlgK [Escherichia albertii]	68.2	119	1	5e-11	1	WP_060877246.1
Select seq ref|WP_087597210.1|	flagellar hook-associated protein FlgK [Escherichia coli]	68.2	160	1	5e-11	1	WP_087597210.1
Select seq ref|WP_053893882.1|	flagellar hook-associated protein FlgK [Escherichia coli]	68.2	160	1	5e-11	1	WP_053893882.1
Select seq ref|WP_130564177.1|	flagellar hook-associated protein FlgK [Escherichia coli]	68.2	160	1	5e-11	1	WP_130564177.1
Select seq ref|WP_089575936.1|	flagellar hook-associated protein FlgK [Escherichia coli]	68.2	160	1	5e-11	1	WP_089575936.1
Select seq ref|WP_137416097.1|	flagellar hook-associated protein FlgK [Escherichia coli]	68.2	160	1	5e-11	1	WP_137416097.1
Select seq ref|WP_074574873.1|	flagellar hook-associated protein FlgK [Escherichia coli]	68.2	160	1	5e-11	1	WP_074574873.1
Select seq ref|WP_057687986.1|	flagellar hook-associated protein FlgK [Escherichia coli]	68.2	160	1	5e-11	1	WP_057687986.1
Select seq ref|WP_097478450.1|	flagellar hook-associated protein FlgK [Escherichia coli]	68.2	160	1	5e-11	1	WP_097478450.1
Select seq ref|WP_111990570.1|	flagellar hook-associated protein FlgK [Escherichia coli]	68.2	160	1	5e-11	1	WP_111990570.1
Select seq ref|WP_096128884.1|	flagellar hook-associated protein FlgK [Escherichia coli]	68.2	160	1	5e-11	1	WP_096128884.1
Select seq ref|WP_113452335.1|	flagellar hook-associated protein FlgK [Escherichia coli]	68.2	160	1	5e-11	1	WP_113452335.1
Select seq ref|WP_096986458.1|	flagellar hook-associated protein FlgK [Escherichia coli]	68.2	160	1	5e-11	1	WP_096986458.1
Select seq ref|WP_097752768.1|	flagellar hook-associated protein FlgK [Escherichia coli]	68.2	160	1	5e-11	1	WP_097752768.1
Select seq ref|WP_113649783.1|	flagellar hook-associated protein FlgK [Escherichia albertii]	68.2	119	1	5e-11	1	WP_113649783.1
Select seq ref|WP_047645996.1|	flagellar hook-associated protein FlgK [Escherichia coli]	68.2	160	1	5e-11	1	WP_047645996.1
Select seq ref|WP_096246938.1|	flagellar hook-associated protein FlgK [Escherichia coli]	68.2	160	1	5e-11	1	WP_096246938.1
Select seq ref|WP_060571348.1|	flagellar hook-associated protein FlgK [Citrobacter sp. 50677481]	68.2	121	0.98	5e-11	1	WP_060571348.1
Select seq ref|WP_089584574.1|	flagellar hook-associated protein FlgK [Escherichia coli]	68.2	160	1	5e-11	1	WP_089584574.1
Select seq ref|WP_103053466.1|	flagellar hook-associated protein FlgK [Escherichia albertii]	68.2	120	1	5e-11	1	WP_103053466.1
Select seq ref|WP_134799217.1|	flagellar hook-associated protein FlgK [Shigella flexneri]	68.2	160	1	5e-11	1	WP_134799217.1
Select seq ref|WP_096148650.1|	flagellar hook-associated protein FlgK [Escherichia coli]	68.2	160	1	5e-11	1	WP_096148650.1
Select seq ref|WP_113931090.1|	flagellar hook-associated protein FlgK [Escherichia coli]	68.2	160	1	5e-11	1	WP_113931090.1
Select seq ref|WP_097295645.1|	flagellar hook-associated protein FlgK [Escherichia coli]	68.2	159	1	5e-11	1	WP_097295645.1
Select seq ref|WP_096183546.1|	flagellar hook-associated protein FlgK [Escherichia coli]	68.2	160	1	5e-11	1	WP_096183546.1
Select seq ref|WP_136759247.1|	flagellar hook-associated protein FlgK [Escherichia coli]	68.2	160	1	5e-11	1	WP_136759247.1
Select seq ref|WP_097472793.1|	flagellar hook-associated protein FlgK [Escherichia coli]	68.2	160	1	5e-11	1	WP_097472793.1
Select seq ref|WP_134737743.1|	flagellar hook-associated protein FlgK [Escherichia coli]	68.2	160	1	5e-11	1	WP_134737743.1
Select seq ref|WP_115185358.1|	flagellar hook-associated protein FlgK [Escherichia coli]	68.2	160	1	5e-11	1	WP_115185358.1
Select seq ref|WP_108451190.1|	flagellar hook-associated protein FlgK [Escherichia coli]	68.2	160	1	5e-11	1	WP_108451190.1
Select seq ref|WP_111231544.1|	flagellar hook-associated protein FlgK [Escherichia coli]	68.2	160	1	5e-11	1	WP_111231544.1
Select seq ref|WP_097291140.1|	flagellar hook-associated protein FlgK [Escherichia coli]	68.2	160	1	5e-11	1	WP_097291140.1
Select seq ref|WP_063869826.1|	flagellar hook-associated protein FlgK [Escherichia coli]	68.2	160	1	5e-11	1	WP_063869826.1
Select seq ref|WP_089577915.1|	flagellar hook-associated protein FlgK [Escherichia coli]	68.2	160	1	5e-11	1	WP_089577915.1
Select seq ref|WP_137513582.1|	flagellar hook-associated protein FlgK [Escherichia coli]	68.2	160	1	5e-11	1	WP_137513582.1
Select seq ref|WP_112978772.1|	flagellar hook-associated protein FlgK [Escherichia coli]	68.2	160	1	5e-11	1	WP_112978772.1
Select seq ref|WP_088491845.1|	flagellar hook-associated protein FlgK [Escherichia coli]	68.2	160	1	5e-11	1	WP_088491845.1
Select seq ref|WP_087898938.1|	flagellar hook-associated protein FlgK [Escherichia coli]	67.8	160	1	5e-11	1	WP_087898938.1
Select seq ref|WP_033545190.1|	flagellar hook-associated protein FlgK [Escherichia coli]	67.8	160	1	5e-11	1	WP_033545190.1
Select seq ref|WP_142435937.1|	flagellar hook-associated protein FlgK [Escherichia coli]	67.8	158	1	5e-11	1	WP_142435937.1
Select seq ref|WP_115786570.1|	flagellar hook-associated protein FlgK [Escherichia coli]	67.8	160	1	5e-11	1	WP_115786570.1
Select seq ref|WP_134873753.1|	flagellar hook-associated protein FlgK [Escherichia coli]	67.8	160	1	5e-11	1	WP_134873753.1
Select seq ref|WP_101803987.1|	flagellar hook-associated protein FlgK [Escherichia coli]	67.8	160	1	5e-11	1	WP_101803987.1
